# Supplementary material
Source: PubMed Central journal article supplement (PMC2488313)
Supplement: E08-04-0354_1.pdf [file E08-04-0354_1.pdf]

## Supplemental Information

### **Malectin - a novel carbohydrate-binding protein of the endoplasmic reticulum and a candidate player in the early steps of protein *N*-glycosylation**

Thomas Schallus, Christine Jaeckh, Krisztina Féher, Angelina S. Palma, Yan Liu, Jeremy C. Simpson, Mukram Mackeen, Gunter Stier, Toby J. Gibson, Ten Feizi, Tomas Pieler, and Claudia Muhle-Goll

## Supplemental Material and Methods

### **Sequence analysis of malectin and malectin-like proteins**

In the *Xenopus laevis* malectin sequence UniProtKB/TrEMBL accession number Q6INX3 and the human homologue with gene name KIAA0152 and accession Q14165, the SMART server (Letunic et al., 2006) identified a signal peptide using the SignalP algorithm (Emanuelsson et al., 2007) and the transmembrane domain using TMHMM2 (Sonnhammer et al., 1998). Metazoan homologues were retrieved with NCBI Blast (<http://www.ncbi.nlm.nih.gov/BLAST/>) searching the NR non-redundant database, then aligned with Clustal X (Chenna et al., 2003) and edited to tidy the gaps with SeaView (Galtier et al., 1996).

The homologous domain in plant RLKs was identified with NCBI PSI-BLAST searching the NR non-redundant database. The first iteration used the *X. laevis* malectin globular domain (residues 29-211). The second iteration was seeded with the set of metazoan sequences (all E-values < e-30). The third iteration included the ciliate malectin-like proteins and retrieved many plant receptor-like kinases (RLKs) with E-values spanning e-9 – e-5. Addition of any plant RLKs at all into a fourth iteration essentially collects a very large number of plant homologues generated by the genome projects (and is complicated by the fact that agricultural plants are polyploids). Reciprocal PSI-BLAST searches with the plant domain will retrieve the animal sequences, but the returned list becomes very large and unwieldy, due to all these plant sequences. Bacterial carbohydrate-binding proteins are retrieved with good E-values in the PSI-BLAST searches but, after it was found that they added noise to the eukaryotic searches, they were excluded. The plant RLKs were first aligned together and then the malectin-like domains excised and aligned to the animal domains using Clustal X profile alignment. A composite alignment is shown in supplementary Figure S1A and indicates a few well-conserved residues shared by plants and animals. These raise the possibility of a partially conserved function. However, the aromatic residues in the glucose disaccharide-binding pocket (Fig. 4 C and D) are not conserved.

Online resources were examined for any hint that the human KIAA0152 gene was associated with inherited disease. Neither OMIM (Hamosh et al., 2005) nor Gene2Disease (Perez-Iratxeta et al., 2002) contained information on the gene. A literature survey with 12q24.31 (the malectin locus) revealed that the lifestyle-affected, often interlinked conditions of obesity and type II diabetes have both been mapped to 12q24 (Mahtani et al., 1996, Wilson et al., 2006), sometimes to 12q24.31 (reviewed in Florez et al., 2003). The 12q24 gene for the transcription factor HNF1alpha is responsible for an early onset variant of diabetes termed MODY3, but is excluded from the NIDDM2 variant (OMIM:601407) also located at 12q24. The NIDDM2 gene has not been identified, suggesting that the causative gene (or genes) is non-obvious, and may possibly be one of the orphan genes within this region of chromosome12.

### **cDNA library screen and whole mount *in situ* hybridization**

The original *X. laevis* malectin full-length cDNA clone was isolated from an adult pancreas cDNA library (Afelik et al., 2004). Aiming at the identification of new marker genes expressed in the pancreas, 192 clones from this  $\lambda$ ZAP Express phage cDNA library (Stratagene) were randomly picked and plasmids used for antisense RNA generation to study their spatial distribution in *Xenopus laevis* embryos by whole mount *in situ* hybridization (WMISH). One of them (originally termed p150) was further investigated in the context of pancreas organogenesis. It has been renamed malectin in this study. The spatial distribution of malectin transcripts in *X.laevis* embryos was determined by WMISH following standard procedures (Harland 1991, with modifications according to Hollemann et al., 1998). For this purpose, the original clone obtained from the cDNA library, pBK-CMV-p150, was linearised with BamHI and digoxigenin (Roche) labeled antisense RNA was transcribed with T7 RNA-polymerase. Transcripts were purified using the *illustra*<sup>TM</sup> *RNAspin Mini Kit* (GE healthcare). Embryos were cleared in 50% formamide/ 5xSSC/ 1% H<sub>2</sub>O<sub>2</sub> before imaging.

### **Expression constructs for structure determination and interaction studies**

The open reading frame of malectin was subcloned by PCR from the full-length cDNA obtained in the pancreatic library screen (Afelik et al. 2004) into the pCS2+ eukaryotic expression vector. The malectin construct (globular segment, AA 27-213) was cloned into a modified pET-24d vector containing a N-terminal His<sub>6</sub>-tag fused to a Z-tag removable through cleavage with TEV protease for NMR-related studies. It was expressed in *E. coli* BL21 [DE3] and purified on Ni-NTA-agarose with a subsequent cleavage of the fusion tag by TEV-protease and a second purification step on Ni-NTA-agarose.

To determine whether the recombinant protein was monomeric at the high concentrations used in the NMR experiments, we performed an analytical run on a gel filtration column and included 2% maltose in the buffer. Under these conditions the protein eluted at the expected molecular weight. <sup>1</sup>H-T2 measurements showed that the free protein is also monomeric.

### **Saturation transfer difference (STD) experiments**

All sugars for NMR studies were purchased from Sigma-Aldrich with exception of mannobiose (Man $\beta$ 1-4Man), which was purchased from Megazyme, and nigerose which was purchased from COSMO BIO CO., LTD.

The spectra were measured using a pulse sequence in which the difference between the on- and off-resonance experiments was created by phase cycling (Mayer and Meyer, 1999). Presaturation of the protein NMR signals was performed using a train of selective Gaussian pulse of a duration of 49 ms field-strength of 75 Hz each and separated by a short delay of 1ms.

### **Oligosaccharides and oligosaccharide probes and microarray analyses**

Laminarin oligosaccharides, di-, tri- and tetrasaccharides were from Dextra (Reading, UK), penta and hexasaccharides (Megazyme, Wicklow, Ireland), and heptasaccharide (Seikagaku America, Falmouth, MA). Nigerose was from Wako Chemicals (Neuss, Germany). Cellobiose, kojibiose and maltooligosaccharides, di- to heptasaccharides were from Sigma. Tri- to hexasaccharides of cellulose were separated by gel filtration chromatography from a cellooligosaccharide mixture (V-labs purchased via Dextra). Partial depolymerizations of pustulan (Calbiochem) and dextran (Pharmacia) were performed by acetolysis and acid hydrolysis, respectively, and their fragments, di- to heptasaccharides, were fractionated by gel filtration (Palma et al., 2006). The molecular masses of the main components of oligosaccharide fractions from gel filtration were corroborated by MALDI-MS.

The high mannose *N*-glycan, Man<sub>7</sub>GlcNAc<sub>2</sub>, was a gift from Dr VE Piskarev (Moscow) and Man<sub>9</sub>GlcNAc<sub>2</sub> was from Dextra. Glc<sub>3</sub>Man<sub>7</sub>(D1)GlcNAc was recovered from Glc<sub>3</sub>Man<sub>7</sub>(D1)GlcNAc<sub>2</sub> that was prepared for NMR residual dipolar coupling measurements using filamentous bacteriophages (Pf1). Glc<sub>3</sub>Man<sub>7</sub>(D1)GlcNAc<sub>2</sub> was isolated from the glycoprotein HIV-III<sub>B</sub> gp120 secreted by CHO cells treated with the  $\alpha$ -glucosidase inhibitor *N*-butyl deoxynojirimycin, as described previously (Petrescu et al., 1997). The loss of one GlcNAc unit from the original material was attributed to residual endoglycosidase activity present in the bacteriophages. The Glc<sub>2</sub>Man<sub>7</sub>(D1)GlcNAc was obtained from the Glc<sub>3</sub>Man<sub>7</sub>(D1)GlcNAc isomer [(one of three isomers D1, D2 and D3 (Petrescu et al., 1997))] by digestion with  $\alpha$ -glucosidase I at 37°C until completion (Alonzi et al., 2007). Glc<sub>1</sub>Man<sub>9</sub>GlcNAc<sub>2</sub> was isolated from hen egg yolk IgY using a similar procedure to that previously reported by Ohta et al. (1991). These oligosaccharides and the gluco-oligosaccharides were converted to oxime-linked neoglycolipids (AO-NGLs) and their molecular masses were corroborated by MALDI-MS as described (Liu et al., 2007). The molecular ions for the AO-NGLs for Glc<sub>3</sub>Man<sub>7</sub>(D1)GlcNAc, and Glc<sub>1</sub>Man<sub>9</sub>GlcNAc<sub>2</sub> were exclusively *m/z* 2559.3 and 2762.3, respectively; and for Glc<sub>2</sub>Man<sub>7</sub>(D1)GlcNAc *m/z* 2396.8 with minor ions as for the parent glycan, Glc<sub>3</sub>Man<sub>7</sub>(D1)GlcNAc.

Microarrays of 335 lipid-linked oligosaccharide probes, NGL and glycolipids (supplemental Table S6), were robotically generated as described (Palma et al., 2006). Unless otherwise stated the NGLs were prepared by reductive amination (Chai et al., 2003).

Microarray analyses with his-tagged malectin were performed essentially as described (Palma et al., 2006), except that the protein was pre-complexed with mouse monoclonal anti-poly-histidine (Ab1) and biotinylated anti-mouse IgG antibodies (Ab2) (both from Sigma) in a ratio of 1:3:3 (by weight). In brief, the malectin-antibody complexes were prepared by pre-incubating Ab1 with Ab2 for 15 min at ambient temperature, followed by addition of malectin and incubation for a further 15 min. The malectin-antibody complexes were diluted in casein (Pierce) containing 1% (w/v) bovine serum albumin (Sigma) and 10 mM CaCl<sub>2</sub>, to give a final malectin concentration of 20, 5, 1 or 0.5  $\mu$ g/ml. Microarray analysis with biotinylated Concanavalin A (ConA) from Vector Laboratories (at 10  $\mu$ g/ml) was performed as described (Liu et al., 2007). Binding was detected with Alexa Fluor-647-labelled streptavidin (Molecular Probes) and imaging was as described (Palma et al., 2006). Data analysis was performed with a dedicated software (Mark P. Stoll of the Glycosciences Laboratory, unpublished).

## Supplemental References

Afelik, S., Chen, Y., and Pieler, T. (2004). Pancreatic protein disulfide isomerase (XPDIp) is an early marker for the exocrine lineage of the developing pancreas in *Xenopus laevis* embryos. *Gene Expr Patterns* 4, 71-76.

Alonzi, D.S., Neville, D.C., Lachmann, R.H., Dwek, R.A., and Butters, T.D. (2007). Glucosylated free oligosaccharides are biomarkers of endoplasmic reticulum  $\alpha$ -glucosidase inhibition. *Biochem. J.* 409, 571-580.

Chai, W., Stoll, M.S., Galustian, C., Lawson, A.M. and Feizi, T. (2003). Neoglycolipid technology - deciphering information content of glycome. *Methods Enzymol.* 362, 160-195.

Chenna, R., Sugawara, H., Koike, T., Lopez, R., Gibson, T.J., Higgins, D.G., and Thompson, J.D. (2003). Multiple sequence alignment with the Clustal series of programs. *Nucleic Acids Res.* 31, 3497-3500.

- Emanuelsson, O., Brunak, S., von Heijne, G., and Nielsen, H. (2007). Locating proteins in the cell using TargetP, SignalP and related tools. *Nat Protoc.* 2, 953-971.
- Florez, J.C., Hirschhorn, J., and Altshuler, D. (2003). The inherited basis of diabetes mellitus: implications for the genetic analysis of complex traits. *Annu Rev Genomics Hum Genet.* 4, 257-291.
- Galtier, N., Gouy, M., and Gautier, C. (1996) SEAVIEW and PHYLO\_WIN: two graphic tools for sequence alignment and molecular phylogeny. *Comput. Appl. Biosci.* 12, 543-548.
- Harland, R.M. (1991). In situ hybridization: an improved whole-mount method for *Xenopus* embryos. *Methods Cell. Biol.* 36, 685-695.
- Holleman, T., Chen, Y., Grunz, H. and Pieler, T. (1998) Regionalized metabolic activity establishes boundaries of retinoic acid signalling. *EMBO J.* 17, 7361-7372.
- Hamosh, A., Scott, A.F., Amberger, J.S., Bocchini, C.A., and McKusick, V.A. (2005) Online Mendelian Inheritance in Man (OMIM), a knowledgebase of human genes and genetic disorders. *Nucleic Acids Res.* 33 (Database issue), D514-517.
- Letunic, I., Copley, R.R., Pils, B., Pinkert, S., Schultz, J., and Bork, P. (2006) SMART 5: domains in the context of genomes and networks. *Nucleic Acids Res.* 34, D257-260.
- Liu, Y., Feizi, T., Campanero-Rhodes, M.A., Childs, R.A., Zhang, Y., Mulloy, B., Evans, P.G., Osborn, H.M., Otto, D., Crocker, P.R., and Chai, W. (2007). Neoglycolipid probes prepared via oxime ligation for microarray analysis of oligosaccharide-protein interactions. *Chem Biol.* 14, 847-859.
- Mahtani, M.M., Widén, E., Lehto, M., Thomas, J., McCarthy, M., Brayer, J., Bryant, B., Chan, G., Daly, M., Forsblom, C., Kanninen, T., Kirby, A., Kruglyak, L., Munnely, K., Parkkonen, M., Reeve-Daly, M.P., Weaver, A., Brettin, T., Duyk, G., Lander, E.S., and Groop, L.C. (1996). Mapping of a gene for type 2 diabetes associated with an insulin secretion defect by a genome scan in Finnish families. *Nat Genet.* 14, 90-94.
- Mayer, M., and Meyer, B. (1999). Characterization of Ligand Binding by Saturation Transfer Difference NMR Spectra. *Angew. Chem. Int. Ed.* 38, 1784-1788.
- Niehrs, C., Steinbeisser, H., and DeRobertis, E.M. (1994) Mesodermal patterning by a gradient of the vertebrate homeobox gene goosecoid. *Science* 263, 817-820.
- Ohta, M., Hamako, J., Yamamoto, S., Hatta, H., Kim, M., Yamamoto, T., Oka, S., Mizuochi, T., and Matsuura, F. (1991) Structures of asparagine-linked oligosaccharides from hen egg-yolk antibody (IgY). Occurrence of unusual glucosylated oligo-mannose type oligosaccharides in a mature glycoprotein. *Glycoconj. J.* 8, 400-413.
- Palma, A.S., Feizi, T., Zhang, Y., Stoll, M.S., Lawson, A.M., Díaz-Rodríguez, E., Campanero-Rhodes, M.A., Costa, J., Gordon, S., Brown, G.D., and Chai, W. (2006). Ligands for the beta-glucan receptor, Dectin-1, assigned using "designer" microarrays of oligosaccharide probes (neoglycolipids) generated from glucan polysaccharides. *J. Biol. Chem.* 281, 5771-5779.
- Perez-Iratxeta, C., Bork, P., and Andrade, M.A. (2002). Association of genes to genetically inherited diseases using data mining. *Nat Genet.* 31, 316-319.

Petrescu, A.J., Butters, T.D., Reinkensmeier, G., Petrescu, S., Platt, F.M., Dwek, R.A., and Wormald, M.R. (1997). The solution NMR structure of glucosylated N-glycans involved in the early stages of glycoprotein biosynthesis and folding. *EMBO J.* *16*, 4302-4310.

Sonnhammer, E.L., von Heijne, G., and Krogh, A. (1998). A hidden Markov model for predicting transmembrane helices in protein sequences. *Proc. Int. Conf. Intell. Syst. Mol. Biol.* *6*, 175-182.

Wilson, S.G., Adam, G., Langdown, M., Reneland, R., Braun, A., Andrew, T., Surdulescu, G.L., Norberg, M., Dudbridge, F., Reed, P.W., Sambrook, P.N., Kleyn, P.W., and Spector, T.D. (2006). Linkage and potential association of obesity-related phenotypes with two genes on chromosome 12q24 in a female dizygous twin cohort. *Eur J Hum Genet.* *14*, 340-348.

## Supplemental results

### Fig S1

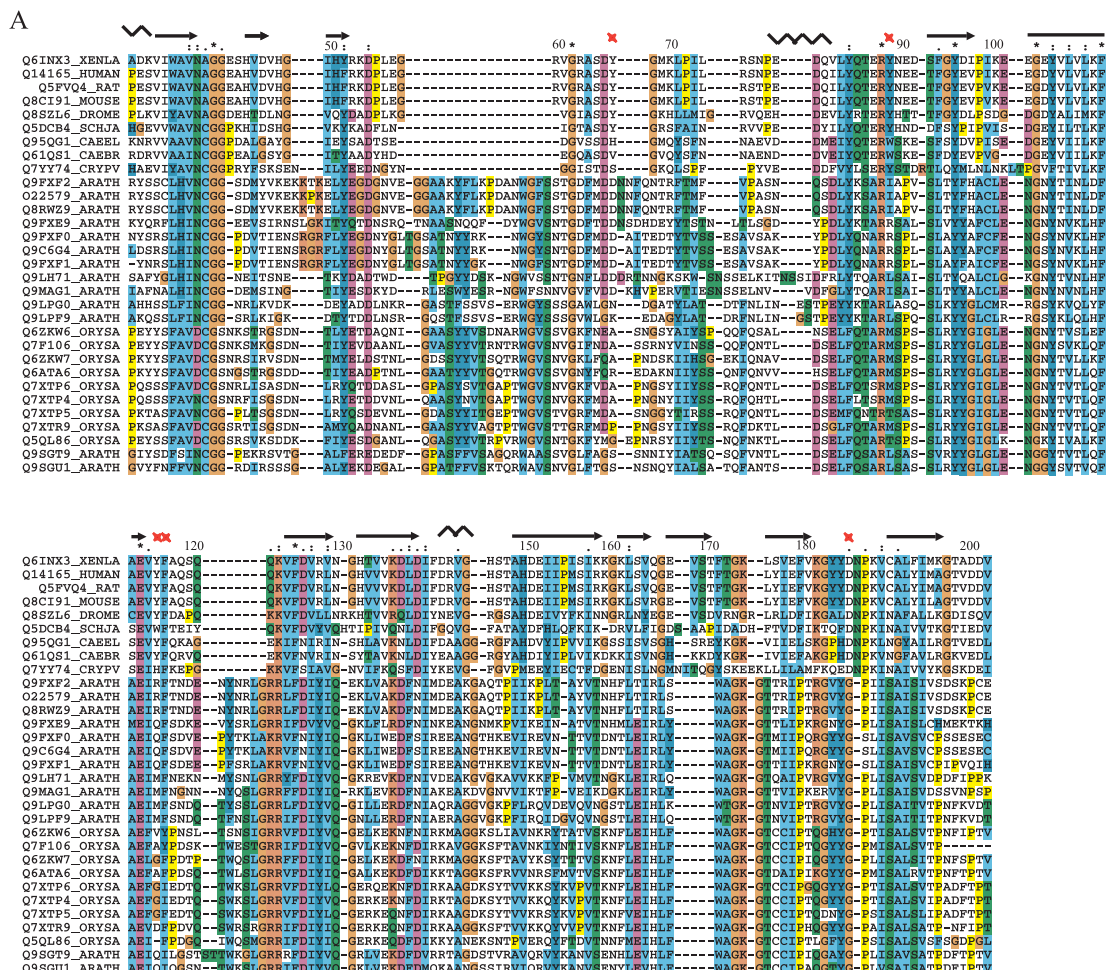

**Figure S1: Sequence alignment of animal malectin proteins vs. *Arabidopsis thaliana* and *Oryza sativa* RLK proteins. (A) Alignment of representative arabidopsis and rice RLK-malectin-like domains with the malectin core domain of *X. laevis*, humans, rat and mouse. Sequences are labelled with UniProtKB/TrEMBL accession numbers. (XENLA = *Xenopus laevis*, DROME = *Drosophila melanogaster*, SCHJA = *Schistosoma japonicum*, CAEEL = *Caenorhabditis elegans*, CRYPV =**

*Cryptospridium parvum*, ARATH = *Arabidopsis thaliana*, ORYSA = *Oryza sativa*). The aromatic residues and the aspartate that in *X. laevis* mediate interactions with the glucose residues (Fig.4D) are marked by red crosses, and are not conserved in plants. (B) Domain topologies of plant and animal proteins that contain the malectin core domain. The two topologies among plant RLKs are shown. Labels: SP - signal peptide; TM- transmembrane helix; LRR - leucine rich repeat; ST-Kinase – serine/threonine receptor-like kinase.

**Fig S2**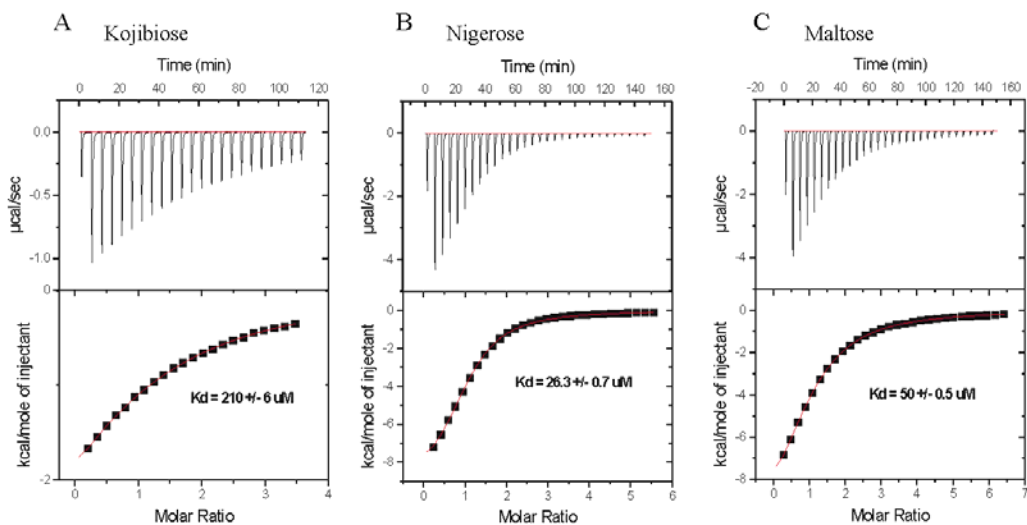

**Figure S2: Malectin binding to glucose disaccharides studied by isothermal titration calorimetry.** Kojibiose (A), nigerose (B) and maltose (C). The raw data are shown in the upper panel, and the integrated heat data, corrected for dilution, are shown in the lower panel.

ITC measurements were carried out using a VP-ITC Microcal calorimeter (Microcal, Northampton, MA, USA) in 20mM phosphate buffer (pH 6.8), 150mM KCl and 1mM TCEP. A typical titration consisted of injecting 10µl of the sugar into the malectin sample, at time intervals of 5min, to ensure that the titration peak returned to the baseline.



Fig S3

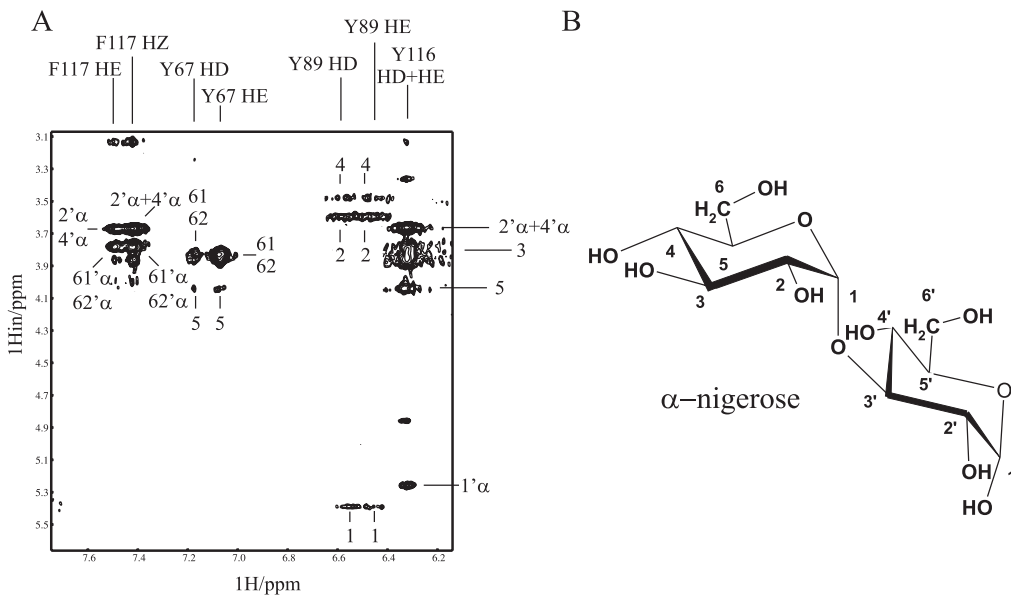

**Figure S3: NOEs between malectin and nigerose.** (A) Part of a  $^{13}\text{C}$ -edited half-filtered-NOESY experiment (mixing time 150 ms) showing intermolecular NOEs between malectin and nigerose. (B) Structure of  $\alpha$ -nigerose.

Fig S4

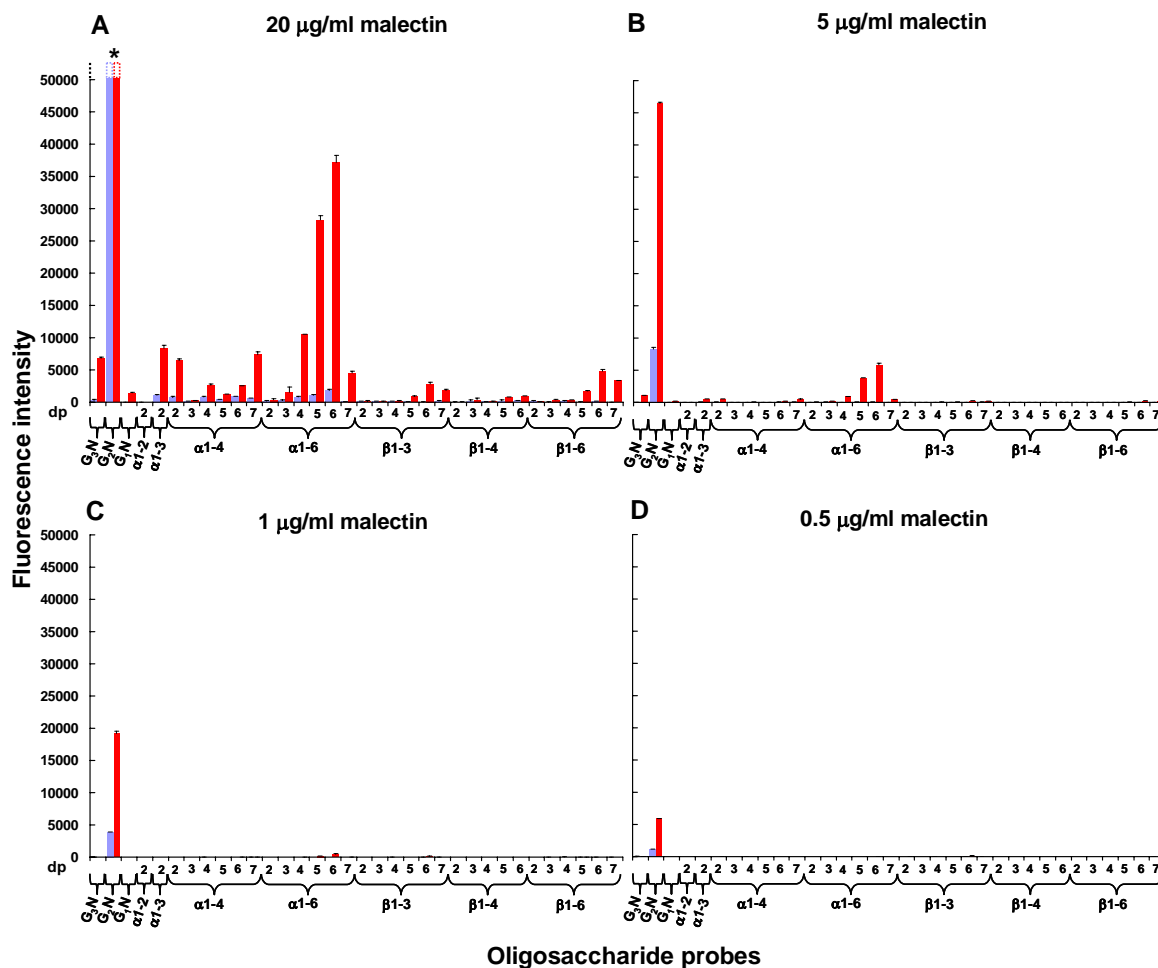

**Figure S4: Microarray analyses of the interactions of malectin with Glc<sub>1</sub>-, Glc<sub>2</sub>- and Glc<sub>3</sub>-high mannose *N*-glycans and gluco-oligosaccharide probes.** The oligosaccharide probes were printed as duplicate spots and binding was assayed with malectin at 20, 5, 1 and 0.5 µg/ml (panels A to D, respectively). Numerical scores are shown for the binding signals [means of duplicate values at 2 and 7 fmol/spot, (blue and red bars, respectively) with error bars]. At a malectin concentration of 20 µg/ml, the binding signals for the Glc<sub>2</sub>-high mannose *N*-glycan probe, both at 2 and 7 fmol, were too high to be accurately quantified (asterisk in A) and were annotated as >> 50000 in Table 1. Other oligosaccharide probes tested included the glucose disaccharides kojibiose (Glcα1-2Glc) nigerose (Glcα1-3Glc), maltodextrins (Glcα1-4Glc, dp 2-7); and oligosaccharides from dextran (isomalto) (Glcα1-6Glc, dp 2-7); laminarin (Glcβ1-3Glc, dp 2-7); cellulose (Glcβ1-4Glc, dp 2-6); and pustulan (Glcβ1-6Glc, dp 2-7). Abbreviations G<sub>3</sub>N, G<sub>2</sub>N and G<sub>1</sub>N designate Glc<sub>3</sub>Man<sub>7</sub>(D1)GlcNAc, Glc<sub>2</sub>Man<sub>7</sub>(D1)GlcNAc and Glc<sub>1</sub>Man<sub>9</sub>GlcNAc<sub>2</sub> *N*-glycan probes, respectively; dp, degree of polymerization of the gluco-oligomers.

**Table S1: Structural statistics of malectin**

|                                                       | $\langle SA \rangle^a$ | $\langle SA^{watref} \rangle^a$ |
|-------------------------------------------------------|------------------------|---------------------------------|
| A. number of structural restraints                    |                        |                                 |
| All NOE (unambiguous/ambiguous)                       | 4426/0                 | 4426/0                          |
| Intraresidual                                         | 1320                   | 1320                            |
| Sequential ( $ i-j =1$ )                              | 869                    | 869                             |
| Medium-range ( $1 <  i-j  \leq 4$ )                   | 456                    | 456                             |
| Long-range ( $ i-j  > 4$ )                            | 1781                   | 1781                            |
| Dihedral angles $\phi\psi$                            | 99/99                  | 99/99                           |
| Hbonds                                                | 66                     | 66                              |
| B. rmsd (Å) from experimental restraints <sup>b</sup> |                        |                                 |
| All distance restraints                               | 0.018±0.000            | 0.025±0.001                     |
| Dihedral angles <sup>c</sup>                          | 1.42±0.085             | 1.65±0.10                       |
| C. coordinate precision (Å) <sup>d</sup>              |                        |                                 |
| N,C <sup>α</sup> ,C <sup>γ</sup>                      | 1.04±0.19              | 1.12±0.17                       |
| All heavy atoms                                       | 1.94±0.28              | 1.96±0.26                       |
| D. structural quality <sup>e</sup>                    |                        |                                 |
| Bad contacts                                          | 12.2±3.8               | 2.1±1.7                         |
| Ramachandran plot (%)                                 |                        |                                 |
| Most favored region                                   | 61.1±3.0               | 68.8±1.7                        |
| Additionally allowed region                           | 32.0±3.5               | 24.3±2.0                        |
| Generously allowed                                    | 4.8±1.9                | 4.6±1.9                         |
| Disallowed                                            | 2.0±1.2                | 2.4±0.7                         |

<sup>a</sup>  $\langle SA \rangle$  is an ensemble of ten lowest-energy solution structures (out of 100 calculated) of malectin (AA28-201) before water-refinement,  $\langle SA^{watref} \rangle$  is the  $\langle SA \rangle$  ensemble after refinement in a shell of water (Linge et al., *Methods Enzymol.* 339,71-90, 2001). The CNS  $E_{repel}$  function was used to simulate van der Waals interactions with an energy constant of 25 kcal mol<sup>-1</sup> Å<sup>-4</sup> using “PROLSQ” van der Waals radii; Rms deviations for bond length, bond angles and improper dihedral angles are 0.0023 (±0.0001) Å, 0.426 (±0.012)° and 0.365 (±0.015)° before and 0.0055 (±0.0002) Å, 0.782 (±0.043)° and 2.15 (±0.21)° after water-refinement. 1kcal=4.18kJ.

<sup>b</sup> Distance restraints were employed with a soft square-well potential using an energy constant of 50 kcal mol<sup>-1</sup> Å<sup>-2</sup>. No distance restraint in the  $\langle SA \rangle^a$  was violated by more than 0.2 Å.

<sup>c</sup> Dihedral angle restraints derived from TALOS (Cornilescu et al., *J. Biomol. NMR* 13, 289-302, 1999) were applied to  $\phi, \psi$  backbone angles using energy constants of 200 kcal mol<sup>-1</sup> rad<sup>-2</sup>.

<sup>d</sup> Coordinate precision is given as the Cartesian coordinate r.m.s. deviation of the ten lowest-energy structures in the NMR ensemble with respect to their mean structure for residue 28 to 201.

<sup>e</sup> Structural quality was analyzed using PROCHECK.

**Table S2: Domains having the highest structural similarity to malectin.** The most similar structures in the PDB data bank identified by a search with MSD-Fold ([www.ebi.ac.uk/msd-srv/ssm/](http://www.ebi.ac.uk/msd-srv/ssm/)) were the structures of the carbohydrate-binding modules (CBMs) of bacterial glycosylhydrolases (representatives of different families are shown) and the carbohydrate recognition domain of a ubiquitin ligase, Fbs1,. Their reported ligands are also shown.

| domain/PDB      | z-score | RMSD(Å) | seq-ID(%) | ligand     | species                           |
|-----------------|---------|---------|-----------|------------|-----------------------------------|
| CBM22 (1dyo)    | 7.3     | 3.2     | 9         | Xylan      | <i>Clostridium thermocellum</i>   |
| Fbs1 CRD (1umh) | 7.2     | 2.9     | 7         | Chitobiose | <i>Mus musculus</i>               |
| CBM22 (1h6y)    | 7.2     | 3.2     | 10        | Xylan      | <i>Clostridium thermocellum</i>   |
| CBM22 (1h6x)    | 7.2     | 3.3     | 9         | Xylan      | <i>Clostridium thermocellum</i>   |
| CBM35 (2bgp)    | 6.6     | 2.8     | 14        | Mannan     | <i>Clostridium japonocus</i>      |
| CBM6 (1uz0)     | 6.3     | 3.7     | 11        | Cellubiose | <i>Clostridium mixtus</i>         |
| CBM27 (1pmj)    | 6.1     | 3.3     | 12        | Mannan     | <i>Clostridium sacharolyticum</i> |
| CBM27 (1pmh)    | 6.0     | 3.3     | 10        | Mannan     | <i>Clostridium sacharolyticum</i> |
| CBM15 (1gny)    | 6.0     | 3.4     | 12        | Xylan      | <i>Pseudomonas cellulosa</i>      |
| CBM4 (1k45)     | 6.0     | 3.0     | 9         | Xylan      | <i>Rhodothermus marinus</i>       |

PDB = protein data bank accession code, seq-ID = overall sequence identity

**Table S3: Carbohydrate-malectin interaction screen by NMR.** Interactions were determined through  $^{15}\text{N}$ -chemical shift perturbation experiments. Relative affinities of oligosaccharides bound were determined through STD experiments.

| Carbohydrate                                                                                        | binding to malectin |
|-----------------------------------------------------------------------------------------------------|---------------------|
| D-sialic acid                                                                                       | –                   |
| L-fucose                                                                                            | –                   |
| D-glucose                                                                                           | –                   |
| D- <i>N</i> -acetyl-glucosamine                                                                     | –                   |
| D-galactose                                                                                         | –                   |
| D-mannose                                                                                           | –                   |
| fructose                                                                                            | –                   |
| D- <i>N</i> -acetyl-galactosamine                                                                   | –                   |
| lactose (Gal $\beta$ 1-4Glc)                                                                        | –                   |
| sucrose (Glc $\alpha$ 1-2Fruc)                                                                      | –                   |
| chitobiose (GlcNAc $\beta$ 1-4GlcNAc)                                                               | –                   |
| trehalose (Glc $\beta$ 1-1Glc)                                                                      | –                   |
| mannobiose (Man $\alpha$ 1-3Man)                                                                    | –                   |
| mannobiose (Man $\beta$ 1-4Man)                                                                     | –                   |
| 3'-sialyllactose (NeuAc $\alpha$ 2,3Gal $\beta$ 1-4Glc)                                             | –                   |
| maltose (Glc $\alpha$ 1-4Glc)                                                                       | ++                  |
| maltotriose (Glc $\alpha$ 1-4Glc $\alpha$ 1-4Glc)                                                   | ++                  |
| maltotetraose (Glc $\alpha$ 1-4Glc $\alpha$ 1-4Glc $\alpha$ 1-4Glc)                                 | ++                  |
| maltoheptaose (Glc $\alpha$ 1-4Glc $\alpha$ 1-4Glc $\alpha$ 1-4Glc $\alpha$ 1-4Glc $\alpha$ 1-4Glc) | ++                  |
| kojibiose (Glc $\alpha$ 1-2Glc)                                                                     | +                   |
| nigerose (Glc $\alpha$ 1-3Glc)                                                                      | ++                  |
| isomaltose (Glc $\alpha$ 1-6Glc)                                                                    | ++                  |
| cellobiose (Glc $\beta$ 1-4Glc)                                                                     | +                   |

– an interaction was not observed in chemical shift perturbation experiments;  
+ an interaction was observed in chemical shift perturbation experiments, but the STD signals were weak  
++ an interaction was observed in chemical shift perturbation experiments and the STD signals were strong

**Table S4: Chemical shift assignment of the disaccharides investigated by STD.** The reducing end glucose rings exist in two isomeric forms in equilibrium,  $\alpha$  and  $\beta$  according to the chirality of the anomeric centre. In the case of the disaccharides maltose, cellobiose, and isomaltose, the proton resonances of the non-reducing end glucose ring are fully overlapping, whereas the frequencies of the protons of the reducing end glucose ring are clearly separated. For nigerose and kojibiose, protons of the non-reducing end glucose also display two sets of resonances for the two isomers.

|    | <i>Maltose</i> |                 | <i>Cellobiose</i> |                 |                |                 |                |                 |
|----|----------------|-----------------|-------------------|-----------------|----------------|-----------------|----------------|-----------------|
|    | $\alpha$       |                 | $\beta$           | $\alpha$        |                | $\beta$         |                |                 |
|    | $^1\text{H}$   | $^{13}\text{C}$ | $^1\text{H}$      | $^{13}\text{C}$ | $^1\text{H}$   | $^{13}\text{C}$ | $^1\text{H}$   | $^{13}\text{C}$ |
| 1  | 5.382          | 99.69           | 5.382             | 99.69           | 4.485          | 102.72          | 4.485          | 102.72          |
| 2  | 3.551          | 71.81           | 3.551             | 71.81           | 3.291          | 73.34           | 3.291          | 73.34           |
| 3  | 3.651          | 72.95           | 3.651             | 72.95           | 3.481          | 75.64           | 3.481          | 75.64           |
| 4  | 3.389          | 69.42           | 3.389             | 69.42           | 3.463          | 76.13           | 3.463          | 76.13           |
| 5  | 3.693          | 72.77           | 3.693             | 72.77           | 3.393          | 69.60           | 3.393          | 69.60           |
| 6  | 3.825<br>3.732 | 60.592          | 3.825<br>3.732    | 60.592          | 3.892<br>3.709 | 60.71           | 3.892<br>3.709 | 60.71           |
| 1' | 5.198          | 92.02           | 4.622             | 95.88           | 5.197          | 91.91           | 4.636          | 95.91           |
| 2' | 3.537          | 71.42           | 3.243             | 74.12           | 3.549          | 71.36           | 3.245          | 74.03           |
| 3' | 3.939          | 73.38           | 3.738             | 76.30           | 3.795          | 71.45           | 3.620          | 78.72           |
| 4' | 3.617          | 76.97           | 3.615             | 76.76           | 3.615          | 78.84           | 3.597          | 74.44           |
| 5' | 3.911          | 70.06           | 3.567             | 74.69           | 3.921          | 70.29           | 3.570          | 74.94           |
| 6' | 3.799          | 60.71           | 3.881<br>3.736    | 60.85           | 3.848          | 60.04           | 3.929<br>3.782 | 60.19           |

|    | <i>Nigerose</i> |       |         |       | <i>Kojibiose</i> |       |         |       |
|----|-----------------|-------|---------|-------|------------------|-------|---------|-------|
|    | $\alpha$        |       | $\beta$ |       | $\alpha$         |       | $\beta$ |       |
| 1  | 5.361           | 99.05 | 5.347   | 98.99 | 5.091            | 96.43 | 5.381   | 97.87 |
| 2  | 3.561           | 71.65 | 3.554   | 71.60 | 3.549            | 71.54 | 3.538   | 71.58 |
| 3  | 3.753           | 72.86 | 3.734   | 72.91 | 3.783            | 72.9  | 3.744   | 72.94 |
| 4  | 3.435           | 69.41 | 3.453   | 69.25 | 3.450            | 69.56 | 3.456   | 69.47 |
| 5  | 4.000           | 71.71 | 4.007   | 71.65 | 3.939            | 71.95 | 4.027   | 71.78 |
| 6  | 3.816           | 60.36 | 3.797   | 60.19 | 3.835            | 60.48 | 3.800   | 60.41 |
|    | 3.765           |       |         |       | 3.775            |       |         |       |
| 1' | 5.226           | 92.19 | 4.656   | 95.93 | 5.433            | 89.57 | 4.791   | 96.38 |
| 2' | 3.626           | 70.07 | 3.327   | 72.80 | 3.630            | 76.04 | 3.378   | 78.68 |
| 3' | 3.841           | 79.58 | 3.630   | 82.15 | 3.810            | 71.37 | 3.565   | 74.59 |
| 4' | 3.626           | 70.07 | 3.640   | 70.02 | 3.453            | 69.72 | 3.422   | 69.89 |
| 5' | 3.843           | 71.16 | 3.567   | 75.59 | 3.855            | 71.45 | 3.456   | 75.87 |
| 6' | 3.837           | 60.37 | 3.878   | 60.54 | 3.840            | 60.72 | 3.890   | 60.94 |
|    | 3.747           |       | 3.711   |       | 3.762            |       | 3.710   |       |

|    | <i>Isomaltose</i> |       |         |       |
|----|-------------------|-------|---------|-------|
|    | $\alpha$          |       | $\beta$ |       |
| 1  | 4.932             | 98.07 | 4.932   | 98.07 |
| 2  | 3.531             | 71.63 | 3.531   | 71.63 |
| 3  | 3.713             | 73.25 | 3.713   | 73.25 |
| 4  | 3.405             | 69.62 | 3.405   | 69.62 |
| 5  | 3.710             | 71.91 | 3.710   | 71.91 |
| 6  | 3.826             | 60.59 | 3.826   | 60.59 |
|    | 3.741             |       | 3.741   |       |
| 1' | 5.218             | 92.37 | 4.650   | 96.25 |

|    | <i>Isomaltose</i> |       |                |       |
|----|-------------------|-------|----------------|-------|
| 2' | 3.527             | 71.57 | 3.228          | 74.19 |
| 3' | 3.685             | 73.19 | 3.459          | 76.14 |
| 4' | 3.493             | 69.68 | 3.494          | 69.50 |
| 5' | 3.986             | 70.14 | 3.616          | 74.44 |
| 6' | 3.973<br>3.675    | 65.88 | 3.932<br>3.733 | 65.83 |



**Table S5: Structural statistics of the malectin-nigerose complex**

|                                                       | <SA <sup>nigerose</sup> > <sup>a</sup> |
|-------------------------------------------------------|----------------------------------------|
| A. number of structural restraints                    |                                        |
| All NOE (unambiguous/ambiguous)                       | 4458/0                                 |
| Protein to protein                                    | 4427                                   |
| Protein to sugar                                      | 31                                     |
| Intraresidual                                         | 1320                                   |
| Sequential ( i-j =1)                                  | 869                                    |
| Medium-range (1< i-j ≤ 4)                             | 456                                    |
| Long-range ( i-j >4)                                  | 1782                                   |
| Dihedral angles $\phi\psi$                            | 99/99                                  |
| Hbonds                                                | 66                                     |
| B. rmsd (Å) from experimental restraints <sup>b</sup> |                                        |
| All distance restraints                               | 0.033±0.03                             |
| Dihedral angles <sup>c</sup>                          | 1.92±0.08                              |
| C. coordinate precision (Å) <sup>d</sup>              |                                        |
| N,C <sup>α</sup> ,C <sup>γ</sup>                      | 0.92±0.16                              |
| All heavy atoms                                       | 1.77±0.18                              |
| D. structural quality <sup>e</sup>                    |                                        |
| Bad contacts                                          | 14.0±2.6                               |
| Ramachandran plot (%)                                 |                                        |
| Most favored region                                   | 63.8±2.2                               |
| Additionally allowed region                           | 28.8±2.6                               |
| Generously allowed                                    | 4.8±2.0                                |
| Disallowed                                            | 2.7±0.8                                |

<sup>a</sup> <SA<sup>nigerose</sup>> is an ensemble of ten lowest-energy solution structures (out of 100 calculated) of the malectin nigerose complex (AA28-201) before water-refinement. The CNS  $E_{\text{repel}}$  function was used to simulate van der Waals interactions with an energy constant of 25 kcal mol<sup>-1</sup> Å<sup>-4</sup> using “PROLSQ” van der Waals radii; Rms deviations for bond length, bond angles and improper dihedral angles are 0.0023 (±0.0001) Å, 0.426 (±0.012)° and 0.365 (±0.015)° before water-refinement. 1kcal=4.18kJ.

<sup>b</sup>Distance restraints were employed with a soft square-well potential using an energy constant of 50 kcal mol<sup>-1</sup>Å<sup>-2</sup>.

<sup>c</sup>Dihedral angle restraints derived from TALOS (Cornilescu et al., J. Biomol. NMR 13, 289-302, 1999) were applied to  $\phi,\psi$  backbone angles using energy constants of 200 kcal mol<sup>-1</sup> rad<sup>-2</sup>.

<sup>d</sup>Coordinate precision is given as the Cartesian coordinate r.m.s. deviation of the ten lowest-energy structures in the NMR ensemble with respect to their mean structure for residue 28 to 201.

<sup>e</sup>Structural quality was analyzed using PROCHECK.

**Table S6: Oligosaccharide probes\* included in the microarray and the binding signals (means at 7 fmol) with malectin at 5µg/ml.**

| Pos**                 | Probe Name            | Sequence                               | Signal at 7 fmol |
|-----------------------|-----------------------|----------------------------------------|------------------|
| <b>Mammalian-type</b> |                       |                                        |                  |
| 1                     | Glucocerebrosides     | Glcβ-Cer                               | 5                |
| 2                     | Lac                   | Galβ-4Glc-DH                           | 12               |
| 3                     | Lac-AO                | Galβ-4Glc-AO                           | 16               |
| 4                     | Lactocerebrosides     | Galβ-4Glcβ-Cer                         | 11               |
| 5                     | LacNAc                | Galβ-4GlcNAc-DH                        | 10               |
| 6                     | Galβ-3GalNAc          | Galβ-3GalNAc-DH                        | 1                |
| 7                     | Galβ-6GalNAc          | Galβ-6GalNAc-DH                        | 10               |
| 8                     | GalNAcα-3Galβ-4Glc    | GalNAcα-3Galβ-4Glc-DH                  | 11               |
| 9                     | Galα-4Galβ-4GlcNAc    | Galα-4Galβ-4GlcNAc-DH                  | 2                |
| 10                    | Ceramide trihexoside  | Galα-4Galβ-4Glcβ-Cer                   | <1               |
| 11                    | Globoside (P-antigen) | GalNAcβ-3Galα-4Galβ-4Glcβ-Cer          | 3                |
| 12                    | Forssmann glycolipid  | GalNAcα-3GalNAcβ-3Galα-4Galβ-4Glcβ-Cer | <1               |
| 13                    | H-Di                  | Fucα-2Gal-DH                           | 31               |
| 14                    | B-Tri                 | Galα-3Gal-DH<br> <br>Fucα-2            | 5                |
| 15                    | A-Tri                 | GalNAcα-3Gal-DH<br> <br>Fucα-2         | <1               |
| 16                    | Lex-Tri               | Galβ-4GlcNAc-DH<br> <br>Fucα-3         | 9                |
| 17                    | Lea-Tri               | Galβ-3GlcNAc-DH<br> <br>Fucα-4         | <1               |
| 18                    | GM4                   | NeuAcα-3Galβ-Cer                       | <1               |
| 19                    | NeuAcα-(3')Lac        | NeuAcα-3Galβ-4Glc-DH                   | 31               |
| 20                    | NeuAcα-(6')Lac        | NeuAcα-6Galβ-4Glc-DH                   | 10               |
| 21                    | NeuAcβ-(3')Lac        | NeuAcβ-3Galβ-4Glc-DH                   | 7                |
| 22                    | NeuAcβ-(6')Lac        | NeuAcβ-6Galβ-4Glc-DH                   | 25               |
| 23                    | Neuα-(3')Lac          | Neuα-3Galβ-4Glc-DH                     | 10               |
| 24                    | Neuα-(6')Lac          | Neuα-6Galβ-4Glc-DH                     | 21               |
| 25                    | Neu4,5Ac-(3')Lac      | Neu4,5Acα-3Galβ-4Glc-DH                | <1               |
| 26                    | Neu5,9Ac-(6')LN       | Neu5,9Acα-6Galβ-4GlcNAc-DH             | 9                |
| 27                    | GM3                   | NeuAcα-3Galβ-4Glcβ-Cer                 | <1               |
| 28                    | GM3(Gc)               | NeuGcα-3Galβ-4Glcβ-Cer                 | 23               |
| 29                    | NeuAcα-(6')LN         | NeuAcα-6Galβ-4GlcNAc-DH                | <1               |
| 30                    | Haematoside           | NeuAcα-3Galβ-4Glcβ-Cer                 | <1               |
| 31                    | SA(3')-Lea-Tri        | NeuAcα-3Galβ-3GlcNAc-DH<br> <br>Fucα-4 | <1               |
| 32                    | GD3                   | NeuAcα-8NeuAcα-3Galβ-4Glcβ-Cer         | <1               |
| 33                    | Sulfatide             | SU-3Galβ-Cer                           | <1               |
| 34                    | GSF-1                 | SU-3Galβ-C30                           | 15               |
| 35                    | GSF-19                | SU-6Glcβ-C30                           | 15               |
| 36                    | SM3                   | SU-3Galβ-4Glc-DH                       | 4                |
| 37                    | SU(3')-LN             | SU-3Galβ-4GlcNAc-DH                    | 5                |
| 38                    | GSC-210               | SU-3GlcAS-3Galβ-Cer42                  | 6                |
| 39                    | SU(3')-Lex-Tri        | SU-3Galβ-4GlcNAc-DH<br> <br>Fucα-3     | <1               |

|    |                          |                                                                  |    |
|----|--------------------------|------------------------------------------------------------------|----|
| 40 | SU(3')-Lea-Tri           | SU-3GalB-3GlcNAc-DH<br> <br>Fuca-4                               | 9  |
| 41 | GSC-150                  | SU-3GalB-4GlcB-C30<br> <br>Fuca-3                                | 3  |
| 42 | GSC-432                  | 3-deoxy, 3-carboxymethyl-GalB-4GlcB-C30                          | 15 |
| 43 | GSC-430                  | 3-deoxy, 3-carboxymethyl-GalB-3GlcB-C30<br> <br>Fuca-4           | 1  |
| 44 | GSC-260                  | 3-deoxy, 3-carboxymethyl-GalB-4GlcB-C30<br> <br>Fuca-3           | 6  |
| 45 | GSC-209                  | GlcAB-3GalB-Cer42                                                | <1 |
| 46 | Glc                      | Glc-DH                                                           | 7  |
| 47 | Gal                      | Gal-DH                                                           | 2  |
| 48 | Gal-AO                   | Gal-AO                                                           | 15 |
| 49 | LacNAc-AO                | GalB-4GlcNAc-AO                                                  | 11 |
| 50 | NeuAcα-(3')LN            | NeuAcα-3GalB-4GlcNAc-DH                                          | <1 |
| 51 | NeuAcα-(3')LN-AO         | NeuAcα-3GalB-4GlcNAc-AO                                          | <1 |
| 52 | Lea-Tri-AO               | GalB-3GlcNAc-AO<br> <br>Fuca-4                                   | <1 |
| 53 | Lex-Tri-(Me)AO           | GalB-4GlcNAc-(Me)-AO<br> <br>Fuca-3                              | <1 |
| 54 | Neu4,5Ac-(3')Lac-AO      | Neu4,5Acα-3GalB-4Glc-AO                                          | <1 |
| 55 | LacN(1-3)-AO             | GalB-3GlcNAc-AO                                                  | <1 |
| 56 | NeuAcα-(3')Lac-AO        | NeuAcα-3GalB-4Glc-AO                                             | 7  |
| 57 | NeuAcα-(6')Lac-AO        | NeuAcα-6GalB-4Glc-AO                                             | <1 |
| 58 | NeuAcβ-(3')Lac-AO        | NeuAcβ-3GalB-4Glc-AO                                             | 29 |
| 59 | NeuAcβ-(6')Lac-AO        | NeuAcβ-6GalB-4Glc-AO                                             | 5  |
| 60 | Neuα-(3')Lac-AO          | Neuα-3GalB-4Glc-AO                                               | 19 |
| 61 | Neuα-(6')Lac-AO          | Neuα-6GalB-4Glc-AO                                               | 8  |
| 62 | Lex-Tri-AO               | GalB-4GlcNAc-AO<br> <br>Fuca-3                                   | <1 |
| 63 | Galactocerebrosides      | GalB-Cer                                                         | 5  |
| 64 | GSC-426                  | 3-deoxy-3Ac-GalB-C30                                             | 15 |
| 65 | LNT                      | GalB-3GlcNAcB-3GalB-4Glc-DH                                      | 10 |
| 66 | LNnT                     | GalB-4GlcNAcB-3GalB-4Glc-DH                                      | 14 |
| 67 | Paragloboside            | GalB-4GlcNAcB-3GalB-4GlcB-Cer                                    | <1 |
| 68 | B-like pentaosylceramide | Galα-3GalB-4GlcNAcB-3GalB-4GlcB-Cer                              | <1 |
| 69 | Klaus glycolipid         | GalB-3GalB-4GlcNAcB-3GalB-4GlcB-Cer                              | 5  |
| 70 | LNFP-I                   | Fuca-2GalB-3GlcNAcB-3GalB-4Glc-DH                                | 20 |
| 71 | LNFP-III                 | GalB-4GlcNAcB-3GalB-4Glc-DH<br> <br>Fuca-3                       | 39 |
| 72 | LNFP-II                  | GalB-3GlcNAcB-3GalB-4Glc-DH<br> <br>Fuca-4                       | 20 |
| 73 | A-Hexa                   | GalNAcα-3GalB-3GlcNAcB-3GalB-4Glc-DH<br> <br>Fuca-2              | 8  |
| 74 | A-Hepta                  | GalNAcα-3GalB-3GlcNAcB-3GalB-4Glc-DH<br>       <br>Fuca-2 Fuca-4 | 30 |

|    |                      |                                                                                                          |    |
|----|----------------------|----------------------------------------------------------------------------------------------------------|----|
| 75 | LNnDFH-V             | Gal $\beta$ -4GlcNAc $\beta$ -3Gal $\beta$ -4Glc-DH<br>Fuca $\alpha$ -3 Fuca $\alpha$ -2                 | 3  |
| 76 | LNDFH-I              | Fuca $\alpha$ -2Gal $\beta$ -3GlcNAc $\beta$ -3Gal $\beta$ -4Glc-DH<br>Fuca $\alpha$ -4                  | <1 |
| 77 | LNnDFH-I             | Fuca $\alpha$ -2Gal $\beta$ -4GlcNAc $\beta$ -3Gal $\beta$ -4Glc-DH<br>Fuca $\alpha$ -3                  | <1 |
| 78 | LNnDFH-II            | Gal $\beta$ -4GlcNAc $\beta$ -3Gal $\beta$ -4Glc-DH<br>Fuca $\alpha$ -3 Fuca $\alpha$ -3                 | <1 |
| 79 | LNDFH-II             | Gal $\beta$ -3GlcNAc $\beta$ -3Gal $\beta$ -4Glc-DH<br>Fuca $\alpha$ -4 Fuca $\alpha$ -3                 | <1 |
| 80 | LNnTFH-I             | Fuca $\alpha$ -2Gal $\beta$ -4GlcNAc $\beta$ -3Gal $\beta$ -4Glc-DH<br>Fuca $\alpha$ -3 Fuca $\alpha$ -2 | 6  |
| 81 | LNTFH-I              | Fuca $\alpha$ -2Gal $\beta$ -3GlcNAc $\beta$ -3Gal $\beta$ -4Glc-DH<br>Fuca $\alpha$ -4 Fuca $\alpha$ -2 | 14 |
| 82 | Leb-hexaosylceramide | Fuca $\alpha$ -2Gal $\beta$ -3GlcNAc $\beta$ -3Gal $\beta$ -4Glc $\beta$ -Cer<br>Fuca $\alpha$ -4        | <1 |
| 83 | B-hexaosylceramide   | Gal $\alpha$ -3Gal $\beta$ -4GlcNAc $\beta$ -3Gal $\beta$ -4Glc $\beta$ -Cer<br>Fuca $\alpha$ -2         | 22 |
| 84 | LSTa                 | NeuAc $\alpha$ -3Gal $\beta$ -3GlcNAc $\beta$ -3Gal $\beta$ -4Glc-DH                                     | 24 |
| 85 | GSC-31               | NeuAc $\alpha$ -3Gal $\beta$ -4GlcNAc $\beta$ -3Gal $\beta$ -4Glc $\beta$ -Cer36                         | 9  |
| 86 | Sialylparagloboside  | NeuAc $\alpha$ -3Gal $\beta$ -4GlcNAc $\beta$ -3Gal $\beta$ -4Glc $\beta$ -Cer                           | <1 |
| 87 | SA(3')-LNFP-II       | NeuAc $\alpha$ -3Gal $\beta$ -3GlcNAc $\beta$ -3Gal $\beta$ -4Glc-DH<br>Fuca $\alpha$ -4                 | <1 |
| 88 | SA(3')-LNFP-III      | NeuAc $\alpha$ -3Gal $\beta$ -4GlcNAc $\beta$ -3Gal $\beta$ -4Glc-DH<br>Fuca $\alpha$ -3                 | <1 |
| 89 | GSC-64               | NeuAc $\alpha$ -3Gal $\beta$ -4GlcNAc $\beta$ -3Gal $\beta$ -4Glc $\beta$ -Cer36<br>Fuca $\alpha$ -3     | <1 |
| 90 | GSC-472              | Neu $\alpha$ -3Gal $\beta$ -4GlcNAc $\beta$ -3Gal $\beta$ -4Glc $\beta$ -Cer36<br>Fuca $\alpha$ -3       | <1 |
| 91 | SA(3/6)LNFP-I        | NeuAc $\alpha$ -3/6Gal $\beta$ -3GlcNAc $\beta$ -3Gal $\beta$ -4Glc-DH<br>Fuca $\alpha$ -2               | <1 |
| 92 | GSC-97               | NeuAc $\alpha$ -6Gal $\beta$ -4GlcNAc $\beta$ -3Gal $\beta$ -4Glc-Cer36<br>Fuca $\alpha$ -3              | <1 |
| 93 | LSTb                 | Gal $\beta$ -3GlcNAc $\beta$ -3Gal $\beta$ -4Glc-DH<br>NeuAc $\alpha$ -6                                 | <1 |
| 94 | DSLNT                | NeuAc $\alpha$ -3Gal $\beta$ -3GlcNAc $\beta$ -3Gal $\beta$ -4Glc-DH<br>NeuAc $\alpha$ -6                | 1  |
| 95 | SU(3')-Tri           | SU-3Gal $\beta$ -4GlcNAc $\beta$ -3Gal-DH                                                                | <1 |
| 96 | GSC-190              | SU-3GlcA $\beta$ -3Gal $\beta$ -4GlcNAc $\beta$ -3Gal $\beta$ -4Glc $\beta$ -Cer42                       | 3  |
| 97 | SU(3')-LNFP-II       | SU-3Gal $\beta$ -3GlcNAc $\beta$ -4Gal $\beta$ -4Glc-DH<br>Fuca $\alpha$ -4                              | <1 |
| 98 | SU(3')-LNFP-III      | SU-3Gal $\beta$ -4GlcNAc $\beta$ -3Gal $\beta$ -4Glc-DH<br>Fuca $\alpha$ -3                              | 9  |

|     |                          |                                                                                                                                |    |
|-----|--------------------------|--------------------------------------------------------------------------------------------------------------------------------|----|
| 99  | SU(6')-LNFP-II           | SU-6Gal $\beta$ -3GlcNAc $\beta$ -3Gal $\beta$ -4Glc-DH<br> <br>Fuca $\alpha$ -4                                               | 3  |
| 100 | SU(6')-LNFP-III          | SU-6Gal $\beta$ -4GlcNAc $\beta$ -3Gal $\beta$ -4Glc-DH<br> <br>Fuca $\alpha$ -3                                               | 7  |
| 101 | SU(3',6)-LNFP-III        | SU-6<br> <br>SU-3Gal $\beta$ -4GlcNAc $\beta$ -3Gal $\beta$ -4Glc-DH<br> <br>Fuca $\alpha$ -3                                  | 4  |
| 102 | GSC-268                  | SU-6<br> <br>NeuAc $\alpha$ -3Gal $\beta$ -4GlcNAc $\beta$ -3Gal $\beta$ -4Glc-Cer36<br> <br>Fuca $\alpha$ -3                  | 5  |
| 103 | GSC-268 deNAc            | SU-6<br> <br>Neu $\alpha$ -3Gal $\beta$ -4GlcNAc $\beta$ -3Gal $\beta$ -4Glc-Cer36<br> <br>Fuca $\alpha$ -3                    | 2  |
| 104 | GSC-269                  | SU-6<br> <br>NeuAc $\alpha$ -3Gal $\beta$ -4GlcNAc $\beta$ -3Gal $\beta$ -4Glc-Cer36<br> <br>Fuca $\alpha$ -3                  | <1 |
| 105 | GSC-406                  | SU-6<br> <br>Neu $\alpha$ -3Gal $\beta$ -4GlcNAc $\beta$ -3Gal $\beta$ -4Glc-Cer36<br> <br>Fuca $\alpha$ -3                    | 15 |
| 106 | GSC-270                  | SU-6    SU-6<br>          <br>NeuAc $\alpha$ -3Gal $\beta$ -4GlcNAc $\beta$ -3Gal $\beta$ -4Glc-Cer36<br> <br>Fuca $\alpha$ -3 | <1 |
| 107 | GSC-189                  | GlcA $\beta$ -3Gal $\beta$ -4GlcNAc $\beta$ -3Gal $\beta$ -4Glc-Cer42                                                          | 16 |
| 108 | GSC-207                  | GlcA $\beta$ -3Gal $\beta$ -4GlcNAc $\beta$ -3Gal $\beta$ -4Glc-C30                                                            | 2  |
| 109 | Led-II pentaosylceramide | Fuca $\alpha$ -2Gal $\beta$ -3GlcNAc $\beta$ -3Gal $\beta$ -4Glc-CerA                                                          | <1 |
| 110 | Led-I pentaosylceramide  | Fuca $\alpha$ -2Gal $\beta$ -3GlcNAc $\beta$ -3Gal $\beta$ -4Glc-CerB                                                          | <1 |
| 111 | LNFP-III-AO              | Gal $\beta$ -4GlcNAc $\beta$ -3Gal $\beta$ -4Glc-AO<br> <br>Fuca $\alpha$ -3                                                   | <1 |
| 112 | GSC-31                   | NeuAc $\alpha$ -3Gal $\beta$ -4GlcNAc $\beta$ -3Gal $\beta$ -4Glc-Cer36                                                        | 15 |
| 113 | LSTc                     | NeuAc $\alpha$ -6Gal $\beta$ 4-GlcNAc $\beta$ 3-Gal $\beta$ 4-Glc-DH                                                           | 3  |
| 114 | GSC-208                  | SU-3GlcA $\beta$ -3Gal $\beta$ -4GlcNAc $\beta$ -3Gal $\beta$ -4Glc-C30                                                        | 3  |
| 115 | GSC-97                   | NeuAc $\alpha$ -6Gal $\beta$ -4GlcNAc $\beta$ -3Gal $\beta$ -4Glc-Cer36<br> <br>Fuca $\alpha$ -3                               | 5  |
| 116 | DLNN                     | GlcNAc $\beta$ -3Gal $\beta$ -4Glc-DH                                                                                          | 6  |
| 117 | GSC-105                  | NeuAc $\alpha$ -3Gal $\beta$ -4GlcNAc $\beta$ -3Gal $\beta$ -Cer36<br> <br>Fuca $\alpha$ -3                                    | <1 |
| 118 | GSC-516B                 | Neu $\alpha$ -3Gal $\beta$ -4GlcNAc $\beta$ -3Gal $\beta$ -4Glc-Cer36<br> <br>SU-6                                             | 6  |
| 119 | pLNnH                    | Gal $\beta$ -4GlcNAc $\beta$ -3Gal $\beta$ -4GlcNAc $\beta$ -3Gal $\beta$ -4Glc-DH                                             | <1 |
| 120 | LNnH                     | Gal $\beta$ -4GlcNAc $\beta$ -6<br> <br>Gal $\beta$ -4Glc-DH<br> <br>Gal $\beta$ -4GlcNAc $\beta$ -3                           | 3  |

|     |                              |                                                                                                                                                                                                                                                                                                                                                                                                                                                                                               |    |
|-----|------------------------------|-----------------------------------------------------------------------------------------------------------------------------------------------------------------------------------------------------------------------------------------------------------------------------------------------------------------------------------------------------------------------------------------------------------------------------------------------------------------------------------------------|----|
| 121 | LND                          | $  \begin{array}{c}  \text{Gal}\beta\text{-4GlcNAc}\beta\text{-6} \\    \\  \text{Gal}\beta\text{-4GlcNAc}\beta\text{-6} \\    \qquad   \\  \text{Gal}\beta\text{-3GlcNAc}\beta\text{-3} \qquad \text{Gal}\beta\text{-4Glc-DH} \\    \\  \text{Gal}\beta\text{-3GlcNAc}\beta\text{-3}  \end{array}  $                                                                                                                                                                                         | <1 |
| 122 | Nonaosylceramide             | $  \begin{array}{c}  \text{GlcNAc}\beta\text{-6} \\    \\  \text{Gal}\beta\text{-4GlcNAc}\beta\text{-3} \\    \\  \text{GlcNAc}\beta\text{-3}  \end{array}  \qquad  \begin{array}{c}  \text{GlcNAc}\beta\text{-6} \\    \\  \text{Gal}\beta\text{-4GlcNAc}\beta\text{-3Gal}\beta\text{-4Glc}\beta\text{-Cer}  \end{array}  $                                                                                                                                                                  | <1 |
| 123 | I-dodecaosylceramide         | $  \begin{array}{c}  \text{Gal}\beta\text{-4GlcNAc}\beta\text{-6} \\    \\  \text{Gal}\beta\text{-4GlcNAc}\beta\text{-6} \\    \\  \text{Gal}\beta\text{-4GlcNAc}\beta\text{-3} \\    \\  \text{Gal}\beta\text{-4GlcNAc}\beta\text{-3}  \end{array}  \qquad  \begin{array}{c}  \text{Gal}\beta\text{-4GlcNAc}\beta\text{-6} \\    \\  \text{Gal}\beta\text{-4GlcNAc}\beta\text{-3Gal}\beta\text{-4Glc}\beta\text{-Cer}  \end{array}  $                                                        | 23 |
| 124 | B-like pentadecaosylceramide | $  \begin{array}{c}  \text{Gal}\alpha\text{-3Gal}\beta\text{-4GlcNAc}\beta\text{-6} \\    \\  \text{Gal}\alpha\text{-3Gal}\beta\text{-4GlcNAc}\beta\text{-6} \\    \\  \text{Gal}\beta\text{-4GlcNAc}\beta\text{-3} \\    \\  \text{Gal}\alpha\text{-3Gal}\beta\text{-4GlcNAc}\beta\text{-3}  \end{array}  \qquad  \begin{array}{c}  \text{Gal}\beta\text{-4GlcNAc}\beta\text{-6} \\    \\  \text{Gal}\beta\text{-4GlcNAc}\beta\text{-3Gal}\beta\text{-4Glc}\beta\text{-Cer}  \end{array}  $  | 15 |
| 125 | I-hexadecaosylceramide       | $  \begin{array}{c}  \text{Gal}\beta\text{-4GlcNAc}\beta\text{-6} \\    \\  \text{Gal}\beta\text{-4GlcNAc}\beta\text{-6} \\    \\  \text{Gal}\beta\text{-4GlcNAc}\beta\text{-3} \\    \\  \text{Gal}\beta\text{-4GlcNAc}\beta\text{-3}  \end{array}  \qquad  \begin{array}{c}  \text{Gal}\beta\text{-4GlcNAc}\beta\text{-6} \\    \\  \text{Gal}\beta\text{-4GlcNAc}\beta\text{-6} \\    \\  \text{Gal}\beta\text{-4GlcNAc}\beta\text{-3Gal}\beta\text{-4Glc}\beta\text{-Cer}  \end{array}  $ | 49 |
| 126 | B-like eicosaosylceramide    | $  \begin{array}{c}  \text{Gal}\alpha\text{-3Gal}\beta\text{-4GlcNAc}\beta\text{-6} \\    \\  \text{Gal}\alpha\text{-3Gal}\beta\text{-4GlcNAc}\beta\text{-6} \\    \\  \text{Gal}\beta\text{-4GlcNAc}\beta\text{-3} \\    \\  \text{Gal}\alpha\text{-3Gal}\beta\text{-4GlcNAc}\beta\text{-3}  \end{array}  \qquad  \begin{array}{c}  \text{Gal}\beta\text{-4GlcNAc}\beta\text{-6} \\    \\  \text{Gal}\beta\text{-4GlcNAc}\beta\text{-3Gal}\beta\text{-4Glc}\beta\text{-Cer}  \end{array}  $  | 12 |
| 127 | I-eicosaosylceramide         | $  \begin{array}{c}  \text{Gal}\beta\text{-4GlcNAc}\beta\text{-6} \\    \\  \text{Gal}\beta\text{-4GlcNAc}\beta\text{-6} \\    \\  \text{Gal}\beta\text{-4GlcNAc}\beta\text{-3} \\    \\  \text{Gal}\beta\text{-4GlcNAc}\beta\text{-3}  \end{array}  \qquad  \begin{array}{c}  \text{Gal}\beta\text{-4GlcNAc}\beta\text{-6} \\    \\  \text{Gal}\beta\text{-4GlcNAc}\beta\text{-6} \\    \\  \text{Gal}\beta\text{-4GlcNAc}\beta\text{-3Gal}\beta\text{-4Glc}\beta\text{-Cer}  \end{array}  $ | 26 |

|     |                                  |                                                                                                                                                                                                                                                                                                                                                                                                                                                                                                                                                                                 |    |
|-----|----------------------------------|---------------------------------------------------------------------------------------------------------------------------------------------------------------------------------------------------------------------------------------------------------------------------------------------------------------------------------------------------------------------------------------------------------------------------------------------------------------------------------------------------------------------------------------------------------------------------------|----|
| 128 | B-like<br>pentaicosaosylceramide | $  \begin{array}{c}  \text{Gal}\beta\text{-4GlcNAc}\beta\text{-6} \\    \\  \text{Gal}\beta\text{-4GlcNAc}\beta\text{-6} \quad \text{Gal}\beta\text{-4GlcNAc}\beta\text{-3} \\    \qquad \qquad \qquad   \\  \text{Gal}\beta\text{-4GlcNAc}\beta\text{-6} \quad \text{Gal}\beta\text{-4GlcNAc}\beta\text{-6} \\    \qquad \qquad \qquad   \\  \text{Gal}\alpha\text{-3Gal}\beta\text{-4GlcNAc}\beta\text{-6} \quad \text{Gal}\beta\text{-4GlcNAc}\beta\text{-3} \\    \qquad \qquad \qquad   \\  \text{Gal}\alpha\text{-3Gal}\beta\text{-4GlcNAc}\beta\text{-3}  \end{array}  $ | 2  |
| 129 | pLNFH-IV                         | $  \begin{array}{c}  \text{Gal}\beta\text{-3GlcNAc}\beta\text{-3Gal}\beta\text{-4GlcNAc}\beta\text{-3Gal}\beta\text{-4Glc-DH} \\    \\  \text{Fuca}\alpha\text{-3}  \end{array}  $                                                                                                                                                                                                                                                                                                                                                                                              | <1 |
| 130 | DFpLNH-II                        | $  \begin{array}{c}  \text{Gal}\beta\text{-3GlcNAc}\beta\text{-3Gal}\beta\text{-4GlcNAc}\beta\text{-3Gal}\beta\text{-4Glc-DH} \\    \qquad \qquad \qquad   \\  \text{Fuca}\alpha\text{-4} \qquad \qquad \text{Fuca}\alpha\text{-3}  \end{array}  $                                                                                                                                                                                                                                                                                                                              | 9  |
| 131 | MFLNH-III                        | $  \begin{array}{c}  \text{Fuca}\alpha\text{-3} \\    \\  \text{Gal}\beta\text{-4GlcNAc}\beta\text{-6} \\    \\  \text{Gal}\beta\text{-4Glc-DH} \\    \\  \text{Gal}\beta\text{-3GlcNAc}\beta\text{-3}  \end{array}  $                                                                                                                                                                                                                                                                                                                                                          | <1 |
| 132 | MFLNnH(a)                        | $  \begin{array}{c}  \text{Fuca}\alpha\text{-3} \\    \\  \text{Gal}\beta\text{-4GlcNAc}\beta\text{-6} \\    \\  \text{Gal}\beta\text{-4Glc-DH} \\    \\  \text{Gal}\beta\text{-4GlcNAc}\beta\text{-3}  \end{array}  $                                                                                                                                                                                                                                                                                                                                                          | 8  |
| 133 | DFLNH(a)                         | $  \begin{array}{c}  \text{Gal}\beta\text{-4GlcNAc}\beta\text{-6} \\    \qquad \qquad \qquad   \\  \text{Fuca}\alpha\text{-3} \qquad \qquad \text{Gal}\beta\text{-4Glc-DH} \\    \\  \text{Fuca}\alpha\text{-2Gal}\beta\text{-3GlcNAc}\beta\text{-3}  \end{array}  $                                                                                                                                                                                                                                                                                                            | 23 |
| 134 | DFLNH(c)                         | $  \begin{array}{c}  \text{Gal}\beta\text{-4GlcNAc}\beta\text{-6} \\    \\  \text{Gal}\beta\text{-4Glc-DH} \\    \\  \text{Fuca}\alpha\text{-2Gal}\beta\text{-3GlcNAc}\beta\text{-3} \\    \\  \text{Fuca}\alpha\text{-4}  \end{array}  $                                                                                                                                                                                                                                                                                                                                       | 16 |
| 135 | DFLNnH                           | $  \begin{array}{c}  \text{Fuca}\alpha\text{-3} \\    \\  \text{Gal}\beta\text{-4GlcNAc}\beta\text{-6} \\    \\  \text{Gal}\beta\text{-4Glc-DH} \\    \\  \text{Gal}\beta\text{-4GlcNAc}\beta\text{-3} \\    \\  \text{Fuca}\alpha\text{-3}  \end{array}  $                                                                                                                                                                                                                                                                                                                     | <1 |
| 136 | DFLNH(b)                         | $  \begin{array}{c}  \text{Fuca}\alpha\text{-3} \\    \\  \text{Gal}\beta\text{-4GlcNAc}\beta\text{-6} \\    \\  \text{Gal}\beta\text{-4Glc-DH} \\    \\  \text{Gal}\beta\text{-3GlcNAc}\beta\text{-3} \\    \\  \text{Fuca}\alpha\text{-4}  \end{array}  $                                                                                                                                                                                                                                                                                                                     | 9  |

|     |                            |                                                                                                                                                                                                       |    |
|-----|----------------------------|-------------------------------------------------------------------------------------------------------------------------------------------------------------------------------------------------------|----|
| 137 | TFLNH                      | <pre>       Fuca-3             GalB-4GlcNAcB-6             GalB-4Glc-DH             Fuca-2GalB-3GlcNAcB-3             Fuca-4           </pre>                                                         | 8  |
| 138 | TFpLNH-I                   | <pre>     Fuca-2GalB-3GlcNAcB-3GalB-4GlcNAcB-3GalB-4Glc-DH                         Fuca-4       Fuca-3           </pre>                                                                               | 11 |
| 139 | MFILNO-IV                  | <pre>       Fuca-3             GalB-3GlcNAcB-3GalB-4GlcNAcB-6                                       GalB-4Glc-DH                         GalB-3GlcNAcB-3           </pre>                             | 20 |
| 140 | MFLND                      | <pre>       Fuca-3             GalB-4GlcNAcB-6             GalB-4GlcNAcB-6                         GalB-3GlcNAcB-3   GalB-4Glc-DH                         GalB-3GlcNAcB-3           </pre>            | 7  |
| 141 | B-III dodecaosylceramide   | <pre>     Galα-3GalB-4GlcNAcB-6                         Fuca-2       GalB-4GlcNAcB-3GalB-4GlcB-Cer                         Galα-3GalB-4GlcNAcB-3             Fuca-2           </pre>                  | 12 |
| 142 | B-IV tetradecaosylceramide | <pre>       Galα-3GalB-4GlcNAcB-6                         Fuca-2       GalB-4GlcNAcB-3GalB-4GlcB-Cer                         Galα-3GalB-4GlcNAcB-3GalB-4GlcNAcB-3             Fuca-2           </pre> | <1 |
| 143 | MSLNH                      | <pre>     NeuAcα-6GalB-4GlcNAcB-6                                       GalB-4Glc-DH                         GalB-3GlcNAcB-3           </pre>                                                         | <1 |
| 144 | MSLNnH-I                   | <pre>       GalB-4GlcNAcB-6                                       GalB-4Glc-DH                         NeuAcα-6GalB-3GlcNAcB-3           </pre>                                                       | <1 |
| 145 | MSMFLNH                    | <pre>       Fuca-3             GalB-4GlcNAcB-6                                       GalB-4Glc-DH                         NeuAcα-3GalB-3GlcNAcB-3           </pre>                                    | <1 |
| 146 | MFMSLNnH                   | <pre>       GalB-4GlcNAcB-6                         Fuca-3       GalB-4Glc-DH                         NeuAcα-6GalB-3GlcNAcB-3           </pre>                                                        | <1 |



|     |                         |                                                                                                                                                                                                                                                                                      |      |
|-----|-------------------------|--------------------------------------------------------------------------------------------------------------------------------------------------------------------------------------------------------------------------------------------------------------------------------------|------|
| 147 | DSLNNH                  | $\begin{array}{c} \text{NeuAc}\alpha\text{-6Gal}\beta\text{-4GlcNAc}\beta\text{-6} \\   \\ \text{Gal}\beta\text{-4Glc-DH} \\   \\ \text{NeuAc}\alpha\text{-6Gal}\beta\text{-4GlcNAc}\beta\text{-3} \end{array}$                                                                      | <1   |
| 148 | GSC-219                 | SU-3GlcA $\beta$ -3Gal $\beta$ -4GlcNAc $\beta$ -3Gal $\beta$ -4GlcNAc $\beta$ -3Gal $\beta$ -4Glc $\beta$ -Cer36                                                                                                                                                                    | 2    |
| 149 | C4U                     | $\begin{array}{c} \text{NeuAc}\alpha\text{-3Gal}\beta\text{-4GlcNAc}\beta\text{-3Gal}\beta\text{-3GlcNAc-DH} \\   \quad   \quad   \\ \text{SU-6} \quad \text{SU-6} \quad \text{SU-6} \end{array}$                                                                                    | 3    |
| 150 | FucC4U                  | $\begin{array}{c} \text{Fuca-3} \\   \\ \text{NeuAc}\alpha\text{-3Gal}\beta\text{-4GlcNAc}\beta\text{-3Gal}\beta\text{-3GlcNAc-DH} \\   \quad   \quad   \\ \text{SU-6} \quad \text{SU-6} \quad \text{SU-6} \end{array}$                                                              | <1   |
| 151 | GSC-216                 | GlcA $\beta$ -3Gal $\beta$ -4GlcNAc $\beta$ -3Gal $\beta$ -4GlcNAc $\beta$ -3Gal $\beta$ -4Glc $\beta$ -Cer42                                                                                                                                                                        | 8    |
| 152 | TFILNO                  | $\begin{array}{c} \text{Fuca-4} \quad \text{Fuca-3} \\   \quad   \\ \text{Gal}\beta\text{-3GlcNAc}\beta\text{-3Gal}\beta\text{-4GlcNAc}\beta\text{-6} \\   \\ \text{Gal}\beta\text{-4Glc-DH} \\   \\ \text{Gal}\beta\text{-3GlcNAc}\beta\text{-3} \\   \\ \text{Fuca-4} \end{array}$ | 6    |
| 153 | pLNH                    | Gal $\beta$ -3GlcNAc $\beta$ -3Gal $\beta$ -4GlcNAc $\beta$ -3Gal $\beta$ -4Glc-DH                                                                                                                                                                                                   | <1   |
| 154 | LNH                     | $\begin{array}{c} \text{Gal}\beta\text{-4GlcNAc}\beta\text{-6} \\   \\ \text{Gal}\beta\text{-4Glc-DH} \\   \\ \text{Gal}\beta\text{-3GlcNAc}\beta\text{-3} \end{array}$                                                                                                              | 2    |
| 155 | iLNO                    | $\begin{array}{c} \text{Gal}\beta\text{-3GlcNAc}\beta\text{-3Gal}\beta\text{-4GlcNAc}\beta\text{-6} \\   \\ \text{Gal}\beta\text{-4Glc-DH} \\   \\ \text{Gal}\beta\text{-3GlcNAc}\beta\text{-3} \end{array}$                                                                         | <1   |
| 156 | l-octaosylceramide      | $\begin{array}{c} \text{Gal}\beta\text{-4GlcNAc}\beta\text{-6} \\   \\ \text{Gal}\beta\text{-4GlcNAc}\beta\text{-3Gal}\beta\text{-4Glc}\beta\text{-Cer} \\   \\ \text{Gal}\beta\text{-4GlcNAc}\beta\text{-3} \end{array}$                                                            | <1   |
| 157 | B-like decaosylceramide | $\begin{array}{c} \text{Gal}\alpha\text{-3Gal}\beta\text{-4GlcNAc}\beta\text{-6} \\   \\ \text{Gal}\beta\text{-4GlcNAc}\beta\text{-3Gal}\beta\text{-4Glc}\beta\text{-Cer} \\   \\ \text{Gal}\alpha\text{-3Gal}\beta\text{-4GlcNAc}\beta\text{-3} \end{array}$                        | 8    |
| 158 | GSC-217                 | SU-3GlcA $\beta$ -3Gal $\beta$ -4GlcNAc $\beta$ -3Gal $\beta$ -4GlcNAc $\beta$ -3Gal $\beta$ -4Glc $\beta$ -Cer42                                                                                                                                                                    | 10   |
| 159 | GSC-220                 | $\begin{array}{c} \text{NeuAc}\alpha\text{-3Gal}\beta\text{-4GlcNAc}\beta\text{-3Gal}\beta\text{-4GlcNAc}\beta\text{-3Gal}\beta\text{-4Glc}\beta\text{-Cer36} \\   \quad   \\ \text{Fuca-3} \quad \text{Fuca-3} \end{array}$                                                         | 19   |
| 160 | GSC-221                 | $\begin{array}{c} \text{NeuAc}\alpha\text{-3Gal}\beta\text{-4GlcNAc}\beta\text{-3Gal}\beta\text{-4GlcNAc}\beta\text{-3Gal}\beta\text{-4Glc}\beta\text{-Cer36} \\   \\ \text{Fuca-3} \end{array}$                                                                                     | 3    |
| 161 | GSC-218                 | GlcA $\beta$ -3Gal $\beta$ -4GlcNAc $\beta$ -3Gal $\beta$ -4GlcNAc $\beta$ -3Gal $\beta$ -4Glc $\beta$ -Cer36                                                                                                                                                                        | <1   |
| 162 | Glc3Man7(D1)GN1-AO      | $\begin{array}{c} \text{Man}\alpha\text{-6} \\   \\ \text{Man}\alpha\text{-3Man}\alpha\text{-6} \\   \\ \text{Man}\beta\text{-4GlcNAc-AO} \\   \\ \text{Glc}\alpha\text{-2Glc}\alpha\text{-3Glc}\alpha\text{-3Man}\alpha\text{-2Man}\alpha\text{-2Man}\alpha\text{-3} \end{array}$   | 1077 |

|     |                    |                                                                                                                                                                                                                                                                                                                                  |       |
|-----|--------------------|----------------------------------------------------------------------------------------------------------------------------------------------------------------------------------------------------------------------------------------------------------------------------------------------------------------------------------|-------|
| 163 | Glc2Man7(D1)GN1-AO | $  \begin{array}{c}  \text{Man}\alpha\text{-6} \\    \\  \text{Man}\alpha\text{-3Man}\alpha\text{-6} \\    \\  \text{Man}\beta\text{-4GlcNAc-AO} \\    \\  \text{Glc}\alpha\text{-3Glc}\alpha\text{-3Man}\alpha\text{-2Man}\alpha\text{-2Man}\alpha\text{-3}  \end{array}  $                                                     | 46454 |
| 164 | Glc1Man9GN2-AO     | $  \begin{array}{c}  \text{Man}\alpha\text{-2Man}\alpha\text{-6} \\    \\  \text{Man}\alpha\text{-6} \\    \\  \text{Man}\alpha\text{-2Man}\alpha\text{-3} \quad \text{Man}\beta\text{-4GlcNAc}\beta\text{-4GlcNAc-AO} \\    \\  \text{Glc}\alpha\text{-3Man}\alpha\text{-2Man}\alpha\text{-2Man}\alpha\text{-3}  \end{array}  $ | 182   |
| 165 | Man9GN2-AO         | $  \begin{array}{c}  \text{Man}\alpha\text{-2Man}\alpha\text{-6} \\    \\  \text{Man}\alpha\text{-2Man}\alpha\text{-3Man}\alpha\text{-6} \\    \\  \text{Man}\beta\text{-4GlcNAc}\beta\text{-4GlcNAc-AO} \\    \\  \text{Man}\alpha\text{-2Man}\alpha\text{-2Man}\alpha\text{-3}  \end{array}  $                                 | <1    |
| 166 | Man8(D1D3)GN2      | $  \begin{array}{c}  \text{Man}\alpha\text{-2Man}\alpha\text{-6} \\    \\  \text{Man}\alpha\text{-3Man}\alpha\text{-6} \\    \\  \text{Man}\beta\text{-4GlcNAc}\beta\text{-4GlcNAc-DH} \\    \\  \text{Man}\alpha\text{-2Man}\alpha\text{-2Man}\alpha\text{-3}  \end{array}  $                                                   | 3     |
| 167 | Man7(D1)GN2        | $  \begin{array}{c}  \text{Man}\alpha\text{-6} \\    \\  \text{Man}\alpha\text{-3Man}\alpha\text{-6} \\    \\  \text{Man}\beta\text{-4GlcNAc}\beta\text{-4GlcNAc-DH} \\    \\  \text{Man}\alpha\text{-2Man}\alpha\text{-2Man}\alpha\text{-3}  \end{array}  $                                                                     | <1    |
| 168 | Man7(D1)GN2-AO     | $  \begin{array}{c}  \text{Man}\alpha\text{-6} \\    \\  \text{Man}\alpha\text{-3Man}\alpha\text{-6} \\    \\  \text{Man}\beta\text{-4GlcNAc}\beta\text{-4GlcNAc-AO} \\    \\  \text{Man}\alpha\text{-2Man}\alpha\text{-2Man}\alpha\text{-3}  \end{array}  $                                                                     | 17    |
| 169 | Man7(D3)GN2        | $  \begin{array}{c}  \text{Man}\alpha\text{-2Man}\alpha\text{-6} \\    \\  \text{Man}\alpha\text{-3Man}\alpha\text{-6} \\    \\  \text{Man}\beta\text{-4GlcNAc}\beta\text{-4GlcNAc-DH} \\    \\  \text{Man}\alpha\text{-2Man}\alpha\text{-3}  \end{array}  $                                                                     | <1    |
| 170 | Man6GN2            | $  \begin{array}{c}  \text{Man}\alpha\text{-6} \\    \\  \text{Man}\alpha\text{-3Man}\alpha\text{-6} \\    \\  \text{Man}\beta\text{-4GlcNAc}\beta\text{-4GlcNAc-DH} \\    \\  \text{Man}\alpha\text{-2Man}\alpha\text{-3}  \end{array}  $                                                                                       | <1    |
| 171 | Man5GN2            | $  \begin{array}{c}  \text{Man}\alpha\text{-6} \\    \\  \text{Man}\alpha\text{-3Man}\alpha\text{-6} \\    \\  \text{Man}\beta\text{-4GlcNAc}\beta\text{-4GlcNAc-DH} \\    \\  \text{Man}\alpha\text{-3}  \end{array}  $                                                                                                         | <1    |

|     |          |                                                                                                                                                                                                                                                |    |
|-----|----------|------------------------------------------------------------------------------------------------------------------------------------------------------------------------------------------------------------------------------------------------|----|
| 172 | Man4aGN2 | $\begin{array}{c} \text{Man}\alpha\text{-3Man}\alpha\text{-6} \\   \\ \text{Man}\beta\text{-4GlcNAc}\beta\text{-4GlcNAc-DH} \\   \\ \text{Man}\alpha\text{-3} \end{array}$                                                                     | <1 |
| 173 | Man4bGN2 | $\begin{array}{c} \text{Man}\alpha\text{-6} \\   \\ \text{Man}\alpha\text{-3Man}\alpha\text{-6} \\   \\ \text{Man}\beta\text{-4GlcNAc}\beta\text{-4GlcNAc-DH} \end{array}$                                                                     | <1 |
| 174 | Man3FGN2 | $\begin{array}{c} \text{Man}\alpha\text{-6} \quad \text{Fuc}\alpha\text{-6} \\   \quad \quad   \\ \text{Man}\beta\text{-4GlcNAc}\beta\text{-4GlcNAc-DH} \\   \\ \text{Man}\alpha\text{-3} \end{array}$                                         | <1 |
| 175 | Man3GN2  | $\begin{array}{c} \text{Man}\alpha\text{-6} \\   \\ \text{Man}\beta\text{-4GlcNAc}\beta\text{-4GlcNAc-DH} \\   \\ \text{Man}\alpha\text{-3} \end{array}$                                                                                       | 11 |
| 176 | Man2aGN2 | $\text{Man}\alpha\text{-6Man}\beta\text{-4GlcNAc}\beta\text{-4GlcNAc-DH}$                                                                                                                                                                      | 25 |
| 177 | Man2GN1  | $\text{Man}\alpha\text{-3Man}\beta\text{-4GlcNAc-DH}$                                                                                                                                                                                          | <1 |
| 178 | Man1GN1  | $\text{Man}\beta\text{-4GlcNAc-DH}$                                                                                                                                                                                                            | 1  |
| 179 | N1       | $\begin{array}{c} \text{Gal}\beta\text{-4GlcNAc}\beta\text{-2Man}\alpha\text{-6} \quad \text{Fuc}\alpha\text{-6} \\   \quad \quad   \\ \text{Man}\beta\text{-4GlcNAc}\beta\text{-4GlcNAc-DH} \\   \\ \text{Man}\alpha\text{-3} \end{array}$    | 5  |
| 180 | N2       | $\begin{array}{c} \text{Man}\alpha\text{-6} \\   \\ \text{Man}\beta\text{-4GlcNAc}\beta\text{-4GlcNAc-DH} \\   \\ \text{Gal}\beta\text{-4GlcNAc}\beta\text{-2Man}\alpha\text{-3} \end{array}$                                                  | 1  |
| 181 | N4       | $\begin{array}{c} \text{Gal}\beta\text{-4GlcNAc}\beta\text{-2Man}\alpha\text{-6} \\   \\ \text{Man}\beta\text{-4GlcNAc}\beta\text{-4GlcNAc-DH} \\   \\ \text{Man}\alpha\text{-3} \end{array}$                                                  | 1  |
| 182 | N3       | $\begin{array}{c} \text{GlcNAc}\beta\text{-2Man}\alpha\text{-6} \\   \\ \text{Man}\beta\text{-4GlcNAc}\beta\text{-4GlcNAc-DH} \\   \\ \text{GlcNAc}\beta\text{-2Man}\alpha\text{-3} \end{array}$<br>$+\text{Gal}\beta\text{-4}$                | 3  |
| 183 | NGA2     | $\begin{array}{c} \text{GlcNAc}\beta\text{-2Man}\alpha\text{-6} \\   \\ \text{Man}\beta\text{-4GlcNAc}\beta\text{-4GlcNAc-DH} \\   \\ \text{GlcNAc}\beta\text{-2Man}\alpha\text{-3} \end{array}$                                               | <1 |
| 184 | NGA2B    | $\begin{array}{c} \text{GlcNAc}\beta\text{-2Man}\alpha\text{-6} \\   \\ \text{GlcNAc}\beta\text{-4Man}\beta\text{-4GlcNAc}\beta\text{-4GlcNAc-DH} \\   \\ \text{GlcNAc}\beta\text{-2Man}\alpha\text{-3} \end{array}$                           | 10 |
| 185 | NA2      | $\begin{array}{c} \text{Gal}\beta\text{-4GlcNAc}\beta\text{-2Man}\alpha\text{-6} \\   \\ \text{Man}\beta\text{-4GlcNAc}\beta\text{-4GlcNAc-DH} \\   \\ \text{Gal}\beta\text{-4GlcNAc}\beta\text{-2Man}\alpha\text{-3} \end{array}$             | <1 |
| 186 | NGA2F    | $\begin{array}{c} \text{GlcNAc}\beta\text{-2Man}\alpha\text{-6} \quad \text{Fuc}\alpha\text{-6} \\   \quad \quad   \\ \text{Man}\beta\text{-4GlcNAc}\beta\text{-4GlcNAc-DH} \\   \\ \text{GlcNAc}\beta\text{-2Man}\alpha\text{-3} \end{array}$ | <1 |

|     |             |                                                                                                                                                                                                                                                                                                                               |    |
|-----|-------------|-------------------------------------------------------------------------------------------------------------------------------------------------------------------------------------------------------------------------------------------------------------------------------------------------------------------------------|----|
| 187 | NA2F        | $\begin{array}{c} \text{Gal}\beta\text{-4GlcNAc}\beta\text{-2Man}\alpha\text{-6} \quad \text{Fuca}\alpha\text{-6} \\   \quad   \\ \text{Man}\beta\text{-4GlcNAc}\beta\text{-4GlcNAc}\text{-DH} \\   \\ \text{Gal}\beta\text{-4GlcNAc}\beta\text{-2Man}\alpha\text{-3} \end{array}$                                            | <1 |
| 188 | NA2F-AO     | $\begin{array}{c} \text{Gal}\beta\text{-4GlcNAc}\beta\text{-2Man}\alpha\text{-6} \quad \text{Fuca}\alpha\text{-6} \\   \quad   \\ \text{Man}\beta\text{-4GlcNAc}\beta\text{-4GlcNAc}\text{-AO} \\   \\ \text{Gal}\beta\text{-4GlcNAc}\beta\text{-2Man}\alpha\text{-3} \end{array}$                                            | <1 |
| 189 | NA2FB       | $\begin{array}{c} \text{Gal}\beta\text{-4GlcNAc}\beta\text{-2Man}\alpha\text{-6} \quad \text{Fuca}\alpha\text{-6} \\   \quad   \\ \text{GlcNAc}\beta\text{-4Man}\beta\text{-4GlcNAc}\beta\text{-4GlcNAc}\text{-DH} \\   \\ \text{Gal}\beta\text{-4GlcNAc}\beta\text{-2Man}\alpha\text{-3} \end{array}$                        | <1 |
| 190 | A2(2-6)     | $\begin{array}{c} \text{NeuAc}\alpha\text{-6Gal}\beta\text{-4GlcNAc}\beta\text{-2Man}\alpha\text{-6} \\   \\ \text{Man}\beta\text{-4GlcNAc}\beta\text{-4GlcNAc}\text{-DH} \\   \\ \text{NeuAc}\alpha\text{-6Gal}\beta\text{-4GlcNAc}\beta\text{-2Man}\alpha\text{-3} \end{array}$                                             | 1  |
| 191 | A2F(2-3)    | $\begin{array}{c} \text{NeuAc}\alpha\text{-3Gal}\beta\text{-4GlcNAc}\beta\text{-2Man}\alpha\text{-6} \quad \text{Fuca}\alpha\text{-6} \\   \quad   \\ \text{Man}\beta\text{-4GlcNAc}\beta\text{-4GlcNAc}\text{-DH} \\   \\ \text{NeuAc}\alpha\text{-3Gal}\beta\text{-4GlcNAc}\beta\text{-2Man}\alpha\text{-3} \end{array}$    | <1 |
| 192 | AGP-Bi-Ac2  | $\begin{array}{c} \text{NeuAc}\alpha\text{-Gal}\beta\text{-4GlcNAc}\beta\text{-2Man}\alpha\text{-6} \\   \\ \text{Man}\beta\text{-4GlcNAc}\beta\text{-4GlcNAc}\text{-DH} \\   \\ \text{NeuAc}\alpha\text{-Gal}\beta\text{-4GlcNAc}\beta\text{-2Man}\alpha\text{-3} \end{array}$                                               | <1 |
| 193 | AGP-Bi-AcGc | $\begin{array}{c} \text{Gal}\beta\text{-4GlcNAc}\beta\text{-2Man}\alpha\text{-6} \\   \\ \text{Man}\beta\text{-4GlcNAc}\beta\text{-4GlcNAc}\text{-DH} \\   \\ \text{Gal}\beta\text{-4GlcNAc}\beta\text{-2Man}\alpha\text{-3} \\ +\text{NeuGc} \\ +\text{NeuAc} \end{array}$                                                   | <1 |
| 194 | AGP-Bi-Gc2  | $\begin{array}{c} \text{NeuGc}\alpha\text{-Gal}\beta\text{-4GlcNAc}\beta\text{-2Man}\alpha\text{-6} \\   \\ \text{Man}\beta\text{-4GlcNAc}\beta\text{-4GlcNAc}\text{-DH} \\   \\ \text{NeuGc}\alpha\text{-Gal}\beta\text{-4GlcNAc}\beta\text{-2Man}\alpha\text{-3} \end{array}$                                               | <1 |
| 195 | NGA3B       | $\begin{array}{c} \text{GlcNAc}\beta\text{-2Man}\alpha\text{-6} \\   \\ \text{GlcNAc}\beta\text{-4Man}\beta\text{-4GlcNAc}\beta\text{-4GlcNAc}\text{-DH} \\   \\ \text{GlcNAc}\beta\text{-4Man}\alpha\text{-3} \\   \\ \text{GlcNAc}\beta\text{-2} \end{array}$                                                               | <1 |
| 196 | NA3-Lex     | $\begin{array}{c} \text{Gal}\beta\text{-4GlcNAc}\beta\text{-2Man}\alpha\text{-6} \\   \\ \text{Man}\beta\text{-4GlcNAc}\beta\text{-4GlcNAc}\text{-DH} \\   \\ \text{Gal}\beta\text{-4GlcNAc}\beta\text{-4Man}\alpha\text{-3} \\   \\ \text{Gal}\beta\text{-4GlcNAc}\beta\text{-2} \\ +\text{Fuca}\alpha\text{-3} \end{array}$ | <1 |
| 197 | NA3         | $\begin{array}{c} \text{Gal}\beta\text{-4GlcNAc}\beta\text{-2Man}\alpha\text{-6} \\   \\ \text{Man}\beta\text{-4GlcNAc}\beta\text{-4GlcNAc}\text{-DH} \\   \\ \text{Gal}\beta\text{-4GlcNAc}\beta\text{-4Man}\alpha\text{-3} \\   \\ \text{Gal}\beta\text{-4GlcNAc}\beta\text{-2} \end{array}$                                | <1 |

|     |              |                                                                                                                                                                                              |    |
|-----|--------------|----------------------------------------------------------------------------------------------------------------------------------------------------------------------------------------------|----|
| 198 | A3           | <pre> NeuAcα-3Galβ-4GlcNAcβ-2Manα-6               v       Manβ-4GlcNAcβ-4GlcNAc-DH               v NeuAcα-3Galβ-4GlcNAcβ-4Manα-3               v NeuAcα-6Galβ-4GlcNAcβ-2 </pre>              | <1 |
| 199 | NGA4         | <pre> GlcNAcβ-6   v GlcNAcβ-2Manα-6               v       Manβ-4GlcNAcβ-4GlcNAc-DH               v GlcNAcβ-4Manα-3               v GlcNAcβ-2 </pre>                                          | <1 |
| 200 | NA4          | <pre> Galβ-4GlcNAcβ-6   v Galβ-4GlcNAcβ-2Manα-6               v       Manβ-4GlcNAcβ-4GlcNAc-DH               v Galβ-4GlcNAcβ-4Manα-3               v Galβ-4GlcNAcβ-2 </pre>                  | 10 |
| 201 | NGA5B        | <pre> GlcNAcβ-2   v GlcNAcβ-4Manα-6               v       GlcNAcβ-6               v       GlcNAcβ-4Manβ-4GlcNAcβ-4GlcNAc-DH               v GlcNAcβ-4Manα-3               v GlcNAcβ-2 </pre> | 6  |
| 202 | GN2-Man5BGN2 | <pre> Manα-6   v Manα-3Manα-6               v       GlcNAcβ-4Manβ-4GlcNAcβ-4GlcNAc-DH               v GlcNAcβ-2Manα-3 </pre>                                                                 | <1 |
| 203 | Fuc-GlcNAc   | Fucα-6GlcNAc-DH                                                                                                                                                                              | 8  |
| 204 | Man3(α3,α6)  | <pre> Manα-6Man-DH   v Manα-3 </pre>                                                                                                                                                         | <1 |
| 205 | Man5(α3,α6)  | <pre> Manα-6Manα-6Man-DH       v   v Manα-3 Manα-3 </pre>                                                                                                                                    | 3  |
| 206 | Man2(α3)     | Manα-3Man-DH                                                                                                                                                                                 | <1 |
| 207 | Man2(α2)     | Manα-2Man-DH                                                                                                                                                                                 | <1 |
| 208 | SA2(α8)      | NeuAcα-8NeuAc-DH                                                                                                                                                                             | 6  |
| 209 | SA3(α8)      | NeuAcα-8NeuAcα-8NeuAc-DH                                                                                                                                                                     | 10 |
| 210 | SA4(α8)      | NeuAcα-8NeuAcα-8NeuAcα-8NeuAc-DH                                                                                                                                                             | 6  |
| 211 | SA5(α8)      | NeuAcα-8NeuAcα-8NeuAcα-8NeuAcα-8NeuAc-DH***                                                                                                                                                  | <1 |
| 212 | SA6(α8)      | NeuAcα-8NeuAcα-8NeuAcα-8NeuAcα-8NeuAcα-8NeuAc-DH***                                                                                                                                          | <1 |
| 213 | SA7(α8)      | NeuAcα-8NeuAcα-8NeuAcα-8NeuAcα-8NeuAcα-8NeuAcα-8NeuAc-DH***                                                                                                                                  | <1 |
| 214 | SA8(α8)      | NeuAcα-8NeuAcα-8NeuAcα-8NeuAcα-8NeuAcα-8NeuAcα-8NeuAcα-8NeuAc-DH***                                                                                                                          | 3  |
| 215 | SA9(α8)      | NeuAcα-8NeuAcα-8NeuAcα-8NeuAcα-8NeuAcα-8NeuAcα-8NeuAcα-8NeuAcα-8NeuAc-DH***                                                                                                                  | 7  |
| 216 | SA10(α8)     | NeuAcα-8NeuAcα-8NeuAcα-8NeuAcα-8NeuAcα-8NeuAcα-8NeuAcα-8NeuAcα-8NeuAcα-8NeuAc-DH***                                                                                                          | <1 |
| 217 | SA11(α8)     | NeuAcα-8NeuAcα-8NeuAcα-8NeuAcα-8NeuAcα-8NeuAcα-8NeuAcα-8NeuAcα-8NeuAcα-8NeuAcα-8NeuAcα-8NeuAc-DH***                                                                                          | 3  |

|     |                    |                                                                                                                                                                                                                                                                                                                                        |    |
|-----|--------------------|----------------------------------------------------------------------------------------------------------------------------------------------------------------------------------------------------------------------------------------------------------------------------------------------------------------------------------------|----|
| 218 | NeuAc              | NeuAc-DH                                                                                                                                                                                                                                                                                                                               | <1 |
| 219 | NeuAc-AO           | NeuAc-AO                                                                                                                                                                                                                                                                                                                               | <1 |
| 220 | Asialo-GM2         | GalNAc $\beta$ -4Gal $\beta$ -4Glc $\beta$ -Cer                                                                                                                                                                                                                                                                                        | 10 |
| 221 | GalNAc-Tetra       | Gal $\beta$ -3GalNAc $\beta$ -4Gal $\beta$ -4Glc-DH                                                                                                                                                                                                                                                                                    | <1 |
| 222 | Asialo-GM1         | Gal $\beta$ -3GalNAc $\beta$ -4Gal $\beta$ -4Glc $\beta$ -Cer                                                                                                                                                                                                                                                                          | 3  |
| 223 | GM1                | Gal $\beta$ -3GalNAc $\beta$ -4Gal $\beta$ -4Glc $\beta$ -Cer<br> <br>NeuAc $\alpha$ -3                                                                                                                                                                                                                                                | <1 |
| 224 | GM1(Gc)            | Gal $\beta$ -3GalNAc $\beta$ -4Gal $\beta$ -4Glc $\beta$ -Cer<br> <br>NeuGc $\alpha$ -3                                                                                                                                                                                                                                                | <1 |
| 225 | GM1-penta          | Gal $\beta$ -3GalNAc $\beta$ -4Gal $\beta$ -4Glc-DH<br> <br>NeuAc $\alpha$ -3                                                                                                                                                                                                                                                          | <1 |
| 226 | GM1(Gc)-penta      | Gal $\beta$ -3GalNAc $\beta$ -4Gal $\beta$ -4Glc-DH<br> <br>NeuGc $\alpha$ -3                                                                                                                                                                                                                                                          | <1 |
| 227 | GM2                | GalNAc $\beta$ -4Gal $\beta$ -4Glc $\beta$ -Cer<br> <br>NeuAc $\alpha$ -3                                                                                                                                                                                                                                                              | <1 |
| 228 | GD1a               | NeuAc $\alpha$ -3Gal $\beta$ -3GalNAc $\beta$ -4Gal $\beta$ -4Glc $\beta$ -Cer<br> <br>NeuAc $\alpha$ -3                                                                                                                                                                                                                               | <1 |
| 229 | GalNAc-GD1a(Ac,Gc) | GalNAc $\beta$ -4Gal $\beta$ -3GalNAc $\beta$ -4Gal $\beta$ -4Glc $\beta$ -Cer<br>                        <br>NeuGc $\alpha$ -3            NeuAc $\alpha$ -3<br>and/or<br>GalNAc $\beta$ -4Gal $\beta$ -3GalNAc $\beta$ -4Gal $\beta$ -4Glc $\beta$ -Cer<br>                        <br>NeuAc $\alpha$ -3            NeuGc $\alpha$ -3 | <1 |
| 230 | GD1b               | Gal $\beta$ -3GalNAc $\beta$ -4Gal $\beta$ -4Glc $\beta$ -Cer<br> <br>NeuAc $\alpha$ -8NeuAc $\alpha$ -3                                                                                                                                                                                                                               | <1 |
| 231 | GD2                | GalNAc $\beta$ -4Gal $\beta$ -4Glc $\beta$ -Cer<br> <br>NeuAc $\alpha$ -8NeuAc $\alpha$ -3                                                                                                                                                                                                                                             | <1 |
| 232 | GT1a               | NeuAc $\alpha$ -8NeuAc $\alpha$ -3Gal $\beta$ -3GalNAc $\beta$ -4Gal $\beta$ -4Glc $\beta$ -Cer<br> <br>NeuAc $\alpha$ -3                                                                                                                                                                                                              | <1 |
| 233 | GT1b               | NeuAc $\alpha$ -3Gal $\beta$ -3GalNAc $\beta$ -4Gal $\beta$ -4Glc $\beta$ -Cer<br> <br>NeuAc $\alpha$ -8NeuAc $\alpha$ -3                                                                                                                                                                                                              | <1 |
| 234 | GQ1b               | NeuAc $\alpha$ -8NeuAc $\alpha$ -3Gal $\beta$ -3GalNAc $\beta$ -4Gal $\beta$ -4Glc $\beta$ -Cer<br> <br>NeuAc $\alpha$ -8NeuAc $\alpha$ -3                                                                                                                                                                                             | <1 |
| 235 | SM1a               | Gal $\beta$ -3GalNAc $\beta$ -4Gal $\beta$ -4Glc-DH<br> <br>SU-3                                                                                                                                                                                                                                                                       | <1 |
| 236 | SB2                | SU-3GalNAc $\beta$ -4Gal $\beta$ -4Glc-DH<br> <br>SU-3                                                                                                                                                                                                                                                                                 | <1 |
| 237 | SB1a               | SU-3Gal $\beta$ -3GalNAc $\beta$ -4Gal $\beta$ -4Glc-DH<br> <br>SU-3                                                                                                                                                                                                                                                                   | <1 |
| 238 | GD1a-hexa          | NeuAc $\alpha$ -3Gal $\beta$ -3GalNAc $\beta$ -4Gal $\beta$ -4Glc-DH<br> <br>NeuAc $\alpha$ -3                                                                                                                                                                                                                                         | <1 |
| 239 | GM1b               | NeuAc $\alpha$ -3Gal $\beta$ -3GalNAc $\beta$ -4Gal $\beta$ -4Glc $\beta$ -Cer***                                                                                                                                                                                                                                                      | 9  |
| 240 | SM2                | GalNAc $\beta$ -4Gal $\beta$ -4Glc $\beta$ -Cer<br> <br>SU-3                                                                                                                                                                                                                                                                           | 10 |
| 241 | A8/1               | GlcNAc $\alpha$ -4Gal $\beta$ -OX                                                                                                                                                                                                                                                                                                      | <1 |

|     |              |                                                                                                                                                                                                                                                                                                |    |
|-----|--------------|------------------------------------------------------------------------------------------------------------------------------------------------------------------------------------------------------------------------------------------------------------------------------------------------|----|
| 242 | A15/3        | GlcNAc $\alpha$ -4Gal $\beta$ -3Gal $\beta$ -OX<br>Fuca-2                                                                                                                                                                                                                                      | <1 |
| 243 | B13/b        | GalNAc $\beta$ -4Gal $\beta$ -3GlcNAc $\beta$ -OX<br>KDN $\alpha$ -3                                                                                                                                                                                                                           | 3  |
| 244 | DSL          | NeuAc $\alpha$ -3Gal $\beta$ -3GalNAc-DH<br>NeuAc $\alpha$ -6                                                                                                                                                                                                                                  | <1 |
| 245 | A15/1        | SU-6GlcNAc $\beta$ -OY                                                                                                                                                                                                                                                                         | <1 |
| 246 | A8/2         | SU-6<br>Fuca-3GlcNAc $\beta$ -OY                                                                                                                                                                                                                                                               | 3  |
| 247 | B13/a-AO     | GlcA $\beta$ -3Gal $\beta$ -3GlcNAc $\beta$ -OX-AO                                                                                                                                                                                                                                             | 18 |
| 248 | Notch-1      | Fuca-Thr-DH                                                                                                                                                                                                                                                                                    | <1 |
| 249 | Notch-2      | GlcNAc $\beta$ -3Fuca-Thr-DH                                                                                                                                                                                                                                                                   | <1 |
| 250 | Notch-3      | Gal $\beta$ -3GlcNAc $\beta$ -3Fuca-Thr-DH                                                                                                                                                                                                                                                     | 10 |
| 251 | B12/3        | GalNAc $\beta$ -4Gal $\beta$ -OX<br>NeuGc $\alpha$ -3                                                                                                                                                                                                                                          | 70 |
| 252 | Man-Ser      | Man $\alpha$ -Ser-DH                                                                                                                                                                                                                                                                           | 15 |
| 253 | Man-Thr      | Man $\alpha$ -Thr-DH                                                                                                                                                                                                                                                                           | 4  |
| 254 | GalNAc-Thr   | GalNAc $\alpha$ -Thr-DH                                                                                                                                                                                                                                                                        | <1 |
| 255 | GalNAc-Ser   | GalNAc $\alpha$ -Ser-DH                                                                                                                                                                                                                                                                        | 7  |
| 256 | Man-Thr-Succ | Man $\alpha$ -Thr-Succ-DH                                                                                                                                                                                                                                                                      | <1 |
| 257 | Man-Ser-Succ | Man $\alpha$ -Ser-Succ-DH                                                                                                                                                                                                                                                                      | 8  |
| 258 | CSA-4        | AUA-3GalNAc $\beta$ -4GlcA $\beta$ -3GalNAc-DH***<br>SU-4 SU-4                                                                                                                                                                                                                                 | 7  |
| 259 | CSA-14       | AUA-3GalNAc $\beta$ -4GlcA $\beta$ -3GalNAc $\beta$ -4GlcA $\beta$ -<br>SU-4 SU-4 SU-4 SU-4 SU-4<br>3GalNAc $\beta$ -4GlcA $\beta$ -3GalNAc-DH***<br>SU-4 SU-4 | 6  |
| 260 | CSB-4        | AUA-3GalNAc $\beta$ -4IdoA $\alpha$ -3GalNAc-DH***<br>SU-4 SU-4                                                                                                                                                                                                                                | <1 |
| 261 | CSB-14       | AUA-3GalNAc $\beta$ -4IdoA $\alpha$ -3GalNAc $\beta$ -4IdoA $\alpha$ -3GalNAc $\beta$ -4IdoA $\alpha$ -3GalNAc $\beta$ -4IdoA $\alpha$ -3GalNAc $\beta$ -4IdoA $\alpha$ -<br>SU-4 SU-4 SU-4 SU-4 SU-4<br>3GalNAc $\beta$ -4IdoA $\alpha$ -3GalNAc-DH***<br>SU-4 SU-4                           | 14 |
| 262 | CSC-4        | AUA-3GalNAc $\beta$ -4GlcA $\beta$ -3GalNAc-DH***<br>SU-6 SU-6                                                                                                                                                                                                                                 | 5  |
| 263 | CSC-14       | AUA-3GalNAc $\beta$ -4GlcA $\beta$ -3GalNAc $\beta$ -4GlcA $\beta$ -<br>SU-6 SU-6 SU-6 SU-6 SU-6<br>3GalNAc $\beta$ -4GlcA $\beta$ -3GalNAc-DH***<br>SU-6 SU-6 | <1 |
| 264 | HA-4         | GlcA $\beta$ -3GlcNAc $\beta$ -4GlcA $\beta$ -3GlcNAc-DH                                                                                                                                                                                                                                       | 5  |
| 265 | HA-14        | GlcA $\beta$ -3GlcNAc $\beta$ -4GlcA $\beta$ -<br>3GlcNAc $\beta$ -4GlcA $\beta$ -3GlcNAc-DH***                                | 14 |
| 266 | HEP-Di-IS    | AUA-4GlcNS-DH***<br>SU-2 6-SU                                                                                                                                                                                                                                                                  | 12 |
| 267 | HS-8         | AUA-4GlcNAc $\alpha$ -4HexA $\beta$ -4GlcNAc $\alpha$ -4HexA $\beta$ -4GlcNAc $\alpha$ -4HexA $\beta$ -4aMan-DH***                                                                                                                                                                             | 14 |
| 268 | HEP-Di-IS-AO | AUA-4GlcNS-AO<br>SU-2 6-SU                                                                                                                                                                                                                                                                     | <1 |

| <b>Homo-oligomers</b> |                 |                                                                                                                                                                                                                                |      |
|-----------------------|-----------------|--------------------------------------------------------------------------------------------------------------------------------------------------------------------------------------------------------------------------------|------|
| 269                   | Glc2(α2)-AO     | Glcα-2Glc-AO                                                                                                                                                                                                                   | <1   |
| 270                   | Glc2(α3)-AO     | Glcα-3Glc-AO                                                                                                                                                                                                                   | 555  |
| 271                   | Glc2(α4)-AO     | Glcα-4Glc-AO                                                                                                                                                                                                                   | 507  |
| 272                   | Glc3(α4)-AO     | Glcα-4Glcα-4Glc-AO                                                                                                                                                                                                             | 30   |
| 273                   | Glc4(α4)-AO     | Glcα-4Glcα-4Glcα-4Glc-AO                                                                                                                                                                                                       | 95   |
| 274                   | Malto-5-AO      | Glcα-4Glcα-4Glcα-4Glcα-4Glc-AO                                                                                                                                                                                                 | 28   |
| 275                   | Malto-6-AO      | Glcα-4Glcα-4Glcα-4Glcα-4Glcα-4Glc-AO                                                                                                                                                                                           | 140  |
| 276                   | Malto-7-AO      | Glcα-4Glcα-4Glcα-4Glcα-4Glcα-4Glcα-4Glc-AO                                                                                                                                                                                     | 492  |
| 277                   | Glc2(α6)-AO     | Glcα-6Glc-AO                                                                                                                                                                                                                   | 42   |
| 278                   | Glc3(α6)-AO     | Glcα-6Glcα-6Glc-AO                                                                                                                                                                                                             | 34   |
| 279                   | Glc4(α6)-AO     | Glcα-6Glcα-6Glcα-6Glc-AO***                                                                                                                                                                                                    | 933  |
| 280                   | Glc5(α6)-AO     | Glcα-6Glcα-6Glcα-6Glcα-6Glc-AO***                                                                                                                                                                                              | 3805 |
| 281                   | Glc6(α6)-AO     | Glcα-6Glcα-6Glcα-6Glcα-6Glcα-6Glc-AO***                                                                                                                                                                                        | 5793 |
| 282                   | Glc7(α6)-AO     | Glcα-6Glcα-6Glcα-6Glcα-6Glcα-6Glcα-6Glc-AO***                                                                                                                                                                                  | 458  |
| 283                   | Glc2(β3)-AO     | Glcβ-3Glc-AO                                                                                                                                                                                                                   | <1   |
| 284                   | Lam-3-AO        | Glcβ-3Glcβ-3Glc-AO                                                                                                                                                                                                             | <1   |
| 285                   | Lam-4-AO        | Glcβ-3Glcβ-3Glcβ-3Glc-AO                                                                                                                                                                                                       | 36   |
| 286                   | Lam-5-AO        | Glcβ-3Glcβ-3Glcβ-3Glcβ-3Glc-AO                                                                                                                                                                                                 | 54   |
| 287                   | Lam-6-AO        | Glcβ-3Glcβ-3Glcβ-3Glcβ-3Glcβ-3Glc-AO***                                                                                                                                                                                        | 285  |
| 288                   | Lam-7-AO        | Glcβ-3Glcβ-3Glcβ-3Glcβ-3Glcβ-3Glcβ-3Glc-AO***                                                                                                                                                                                  | 210  |
| 289                   | Glc2(β4)-AO     | Glcβ-4Glc-AO                                                                                                                                                                                                                   | <1   |
| 290                   | Cello-3-AO      | Glcβ-4Glcβ-4Glc-AO                                                                                                                                                                                                             | <1   |
| 291                   | Cello-4-AO      | Glcβ-4Glcβ-4Glcβ-4Glc-AO                                                                                                                                                                                                       | <1   |
| 292                   | Cello-5-AO      | Glcβ-4Glcβ-4Glcβ-4Glcβ-4Glc-AO                                                                                                                                                                                                 | 38   |
| 293                   | Cello-6-AO      | Glcβ-4Glcβ-4Glcβ-4Glcβ-4Glcβ-4Glc-AO                                                                                                                                                                                           | 22   |
| 294                   | Glc2(β6)-AO     | Glcβ-6Glc-AO                                                                                                                                                                                                                   | <1   |
| 295                   | Pust-3-AO       | Glcβ-6Glcβ-6Glc-AO                                                                                                                                                                                                             | 27   |
| 296                   | Pust-4-AO       | Glcβ-6Glcβ-6Glcβ-6Glc-AO***                                                                                                                                                                                                    | <1   |
| 297                   | Pust-5-AO       | Glcβ-6Glcβ-6Glcβ-6Glcβ-6Glc***                                                                                                                                                                                                 | 48   |
| 298                   | Pust-6-AO       | Glcβ-6Glcβ-6Glcβ-6Glcβ-6Glcβ-6Glc-AO***                                                                                                                                                                                        | 238  |
| 299                   | Pust-7-AO       | Glcβ-6Glcβ-6Glcβ-6Glcβ-6Glcβ-6Glcβ-6Glc-AO***                                                                                                                                                                                  | 244  |
| 300                   | GalNAcα-3GalNAc | GalNAcα-3GalNAc-DH                                                                                                                                                                                                             | <1   |
| 301                   | GN2             | GlcNAcβ-4GlcNAc-DH                                                                                                                                                                                                             | <1   |
| 302                   | GN3             | GlcNAcβ-4GlcNAcβ-4GlcNAc-DH                                                                                                                                                                                                    | 13   |
| 303                   | Man2(α6)        | Manα-6Man-DH                                                                                                                                                                                                                   | 22   |
| 304                   | Man5(β4)        | Manβ-4Manβ-4Manβ-4Manβ-4Man-DH                                                                                                                                                                                                 | 16   |
| 305                   | Man4(β4)        | Manβ-4Manβ-4Manβ-4Man-DH                                                                                                                                                                                                       | <1   |
| 306                   | Man6(β4)        | Manβ-4Manβ-4Manβ-4Manβ-4Manβ-4Man-DH                                                                                                                                                                                           | 20   |
| 307                   | Ara6(α5)        | Araα-5Araα-5Araα-5Araα-5Araα-5Ara-DH                                                                                                                                                                                           | 19   |
| 308                   | Ara7(α5)        | Araα-5Araα-5Araα-5Araα-5Araα-5Araα-5Ara-DH                                                                                                                                                                                     | 7    |
| 309                   | Xyl5(β4)        | Xylβ-4Xylβ-4Xylβ-4Xylβ-4Xyl-DH                                                                                                                                                                                                 | 13   |
| <b>Miscellaneous</b>  |                 |                                                                                                                                                                                                                                |      |
| 310                   | Man3FXylGN2     | $  \begin{array}{c}  \text{Man}\alpha-6 \\    \\  \text{Xyl}\beta-2\text{Man}\alpha-4\text{GlcNAc}\beta-4\text{GlcNAc-DH} \\    \qquad \qquad \qquad   \\  \text{Man}\alpha-3 \qquad \qquad \text{Fuc}\alpha-3  \end{array}  $ | <1   |
| 311                   | Man3XylGN2      | $  \begin{array}{c}  \text{Man}\alpha-6 \\    \\  \text{Xyl}\beta-2\text{Man}\beta-4\text{GlcNAc}\beta-4\text{GlcNAc-DH} \\    \\  \text{Man}\alpha-3  \end{array}  $                                                          | 2    |
| 312                   | Galα-4Glc-AO    | Galα-4Glc-AO                                                                                                                                                                                                                   | 27   |



|     |                |                                                                             |    |
|-----|----------------|-----------------------------------------------------------------------------|----|
| 313 | Xyl3Glc4       | Glcβ-4Glcβ-4Glcβ-4Glc-DH<br>Xylα-6 Xylα-6 Xylα-6                            | 17 |
| 314 | Gal4(α3,B4,α3) | Galα-3Galβ-4Galα-3Gal-DH                                                    | <1 |
| 315 | SU-Tyr         | SU-Tyr-DH                                                                   | 8  |
| 316 | Carra-Hexa-3S  | aGalα-3Galβ-4aGalα-3Galβ-4aGalα-3Gal-DH<br>SU-4 SU-4 SU-4                   | <1 |
| 317 | Carra-Hexa-4S  | aGalα-3Galβ-4aGalα-3Galβ-4aGalα-3Gal-DH<br>SU-4 SU-2 SU-4 SU-4              | <1 |
| 318 | Carra-Octa-4S  | aGalα-3Galβ-4aGalα-3Galβ-4aGalα-3Galβ-4aGalα-3Gal-DH<br>SU-4 SU-4 SU-4 SU-4 | <1 |
| 319 | Carra-Tetra-2S | aGalα-3Galβ-4aGalα-3Gal-DH<br>SU-4 SU-4                                     | <1 |
| 320 | Carra-Tetra-1S | aGalα-3Galβ-4aGalα-3Gal-DH<br>SU-4                                          | <1 |
| 321 | Glc-AO         | Glc-AO                                                                      | 13 |
| 322 | GalNAc         | GalNAc-DH                                                                   | 16 |
| 323 | GalNAc-AO      | GalNAc-AO                                                                   | 7  |
| 324 | (6P)-Man       | P-6Man-DH                                                                   | 13 |
| 325 | (6P)-Man-AO    | P-6Man-AO                                                                   | 15 |
| 326 | Man            | Man-DH                                                                      | 21 |
| 327 | Man-AO         | Man-AO                                                                      | 33 |
| 328 | Fuc            | Fuc-DH                                                                      | 15 |
| 329 | Fuc-AO         | Fuc-AO                                                                      | 62 |
| 330 | Rha            | Rha-DH                                                                      | <1 |
| 331 | Rha-AO         | Rha-AO                                                                      | 11 |
| 332 | GN             | GlcNAc-DH                                                                   | 8  |
| 333 | GN-AO          | GlcNAc-AO                                                                   | 25 |
| 334 | (6P)-Man5      | P-6Manα-3Manα-3Manα-2Man-DH                                                 | 2  |
| 335 | Glc4(α6,α4,α4) | Glcα-6Glcα-4Glcα-4Glc-DH                                                    | 40 |

\* The oligosaccharide probes are all lipid-linked, and are from the collection assembled in the course of research in Glycosciences Laboratory. DH, designates NGLs prepared from reducing oligosaccharides by reductive amination with the amino lipid, 1,2-dihexadecyl-*sn*-glycero-3-phosphoethanolamine (DHPE); OX and OY designate, respectively, the C1-4 fragment and the C5-6 fragments of GalNAcol of reduced oligosaccharides after mild periodate oxidation followed by reductive amination with DHPE (Chai et al., *Methods Enzymol.* 362, 160-195, 2003); AO, NGLs prepared from reducing oligosaccharides by oxime ligation with an aminoxy (AO) functionalized DHPE (Liu et al., *Chem. Biol.* 14, 847-859, 2007); Cer, natural glycolipids with various ceramide moieties; CerA and CerB denote different natural ceramides; Cer36 and Cer42, synthetic glycolipids with ceramide having a total of 36 and 42 carbon atoms, respectively; C30, a synthetic lipid [2-(tetradecyl)hexadecanol] with 30 carbon atoms. ΔUA, 4,5-unsaturated hexuronic acid; aMan, 2,5-anhydro-mannose; aGal, 3,6-anhydro-galactose.

\*\* Pos, position in screening microarray.

\*\*\* Major component.
